# Supplementary material for: Fast-backward replay of sequentially memorized items in humans
Source: eLife. 2018 Oct 18;7:e35164. doi: 10.7554/eLife.35164 (PMC6231774; doi:10.7554/eLife.35164)
Supplement: Figure 2—source data 1. [file elife-35164-fig2-data1.xlsx]

## Sheet: Fig. 2A Left
time frequency	0	0.01	0.02	0.03	0.04	0.05	0.06	0.07	0.08	0.09	0.1	0.11	0.12	0.13	0.14	0.15	0.16	0.17	0.18	0.19	0.2	0.21	0.22	0.23	0.24	0.25	0.26	0.27	0.28	0.29	0.3	0.31	0.32	0.33	0.34	0.35	0.36	0.37	0.38	0.39	0.4	0.41	0.42	0.43	0.44	0.45	0.46	0.47	0.48
1	1.03924e-05	1.05366e-05	1.07416e-05	1.09321e-05	1.10328e-05	1.12034e-05	1.1317e-05	1.13889e-05	1.15952e-05	1.18429e-05	1.2011e-05	1.20526e-05	1.20619e-05	1.22178e-05	1.23298e-05	1.24301e-05	1.25463e-05	1.25763e-05	1.26535e-05	1.28312e-05	1.29787e-05	1.30969e-05	1.31431e-05	1.31615e-05	1.32771e-05	1.33996e-05	1.34912e-05	1.35026e-05	1.34433e-05	1.34299e-05	1.35143e-05	1.36844e-05	1.37834e-05	1.37801e-05	1.36943e-05	1.37114e-05	1.37559e-05	1.37807e-05	1.37426e-05	1.36919e-05	1.36552e-05	1.37199e-05	1.37375e-05	1.37432e-05	1.37258e-05	1.36813e-05	1.37104e-05	1.37545e-05	1.37535e-05
2	2.70352e-05	2.75621e-05	2.81415e-05	2.87511e-05	2.92356e-05	2.97815e-05	3.02819e-05	3.07617e-05	3.13172e-05	3.18317e-05	3.21605e-05	3.23885e-05	3.25154e-05	3.29116e-05	3.33881e-05	3.37037e-05	3.39826e-05	3.42427e-05	3.45662e-05	3.49406e-05	3.53904e-05	3.56906e-05	3.57779e-05	3.58429e-05	3.60446e-05	3.63669e-05	3.65331e-05	3.65775e-05	3.65705e-05	3.65639e-05	3.66628e-05	3.68925e-05	3.70139e-05	3.69446e-05	3.68041e-05	3.68258e-05	3.68789e-05	3.69058e-05	3.68386e-05	3.6743e-05	3.65722e-05	3.65282e-05	3.64948e-05	3.64223e-05	3.62844e-05	3.61341e-05	3.61611e-05	3.61446e-05	3.60458e-05
3	3.94342e-05	4.02581e-05	4.11441e-05	4.20561e-05	4.2862e-05	4.377e-05	4.47156e-05	4.55921e-05	4.63176e-05	4.69529e-05	4.73827e-05	4.78349e-05	4.8316e-05	4.9165e-05	5.00939e-05	5.07013e-05	5.12291e-05	5.18059e-05	5.24204e-05	5.28801e-05	5.34156e-05	5.36132e-05	5.35187e-05	5.34908e-05	5.35249e-05	5.36638e-05	5.36388e-05	5.35014e-05	5.32884e-05	5.31222e-05	5.29952e-05	5.29912e-05	5.29015e-05	5.26312e-05	5.24126e-05	5.22262e-05	5.19862e-05	5.19358e-05	5.18477e-05	5.16885e-05	5.14246e-05	5.11912e-05	5.09069e-05	5.05794e-05	5.02074e-05	4.99332e-05	4.9677e-05	4.93124e-05	4.89645e-05
4	4.37601e-05	4.45244e-05	4.54408e-05	4.63896e-05	4.74649e-05	4.8694e-05	4.99461e-05	5.11222e-05	5.20763e-05	5.29792e-05	5.36537e-05	5.43507e-05	5.52974e-05	5.67704e-05	5.82563e-05	5.94562e-05	6.04267e-05	6.13281e-05	6.20888e-05	6.26269e-05	6.30756e-05	6.29442e-05	6.25297e-05	6.21527e-05	6.18355e-05	6.13748e-05	6.07855e-05	6.00127e-05	5.92681e-05	5.86246e-05	5.7921e-05	5.73177e-05	5.66669e-05	5.59771e-05	5.5414e-05	5.47974e-05	5.41429e-05	5.3861e-05	5.35904e-05	5.31785e-05	5.28108e-05	5.24085e-05	5.19473e-05	5.13516e-05	5.06788e-05	5.01173e-05	4.94517e-05	4.87416e-05	4.80895e-05
5	4.55816e-05	4.61787e-05	4.69358e-05	4.78823e-05	4.93674e-05	5.09784e-05	5.25269e-05	5.40449e-05	5.54941e-05	5.6811e-05	5.79431e-05	5.92428e-05	6.08368e-05	6.29857e-05	6.52714e-05	6.7465e-05	6.90052e-05	7.02366e-05	7.11202e-05	7.17817e-05	7.21072e-05	7.19042e-05	7.12575e-05	7.02926e-05	6.92595e-05	6.78912e-05	6.62798e-05	6.44749e-05	6.2983e-05	6.16069e-05	6.01643e-05	5.87554e-05	5.75344e-05	5.65201e-05	5.56122e-05	5.4662e-05	5.37791e-05	5.32448e-05	5.26799e-05	5.18956e-05	5.1331e-05	5.07891e-05	5.02093e-05	4.93034e-05	4.83565e-05	4.74061e-05	4.65092e-05	4.56866e-05	4.49139e-05
6	4.68479e-05	4.72895e-05	4.7983e-05	4.90861e-05	5.08514e-05	5.27003e-05	5.44435e-05	5.62397e-05	5.81929e-05	5.99473e-05	6.17184e-05	6.39763e-05	6.64854e-05	6.93781e-05	7.26876e-05	7.59251e-05	7.80373e-05	7.95875e-05	8.07565e-05	8.15077e-05	8.18719e-05	8.19586e-05	8.11458e-05	7.95346e-05	7.75782e-05	7.53554e-05	7.29289e-05	7.04434e-05	6.8397e-05	6.65794e-05	6.48479e-05	6.31616e-05	6.17551e-05	6.07006e-05	5.98657e-05	5.91133e-05	5.83054e-05	5.74659e-05	5.63895e-05	5.5138e-05	5.43362e-05	5.35999e-05	5.26891e-05	5.14409e-05	5.0165e-05	4.88389e-05	4.79477e-05	4.7338e-05	4.68236e-05
7	4.77291e-05	4.79593e-05	4.85685e-05	4.97698e-05	5.15011e-05	5.34002e-05	5.5164e-05	5.69902e-05	5.91829e-05	6.15104e-05	6.41063e-05	6.71106e-05	7.02975e-05	7.37021e-05	7.76421e-05	8.15253e-05	8.43889e-05	8.63794e-05	8.76957e-05	8.8512e-05	8.92185e-05	8.98907e-05	8.93898e-05	8.77095e-05	8.55346e-05	8.32791e-05	8.12149e-05	7.9269e-05	7.73872e-05	7.58396e-05	7.46058e-05	7.35582e-05	7.24492e-05	7.13219e-05	7.05428e-05	7.01206e-05	6.94732e-05	6.81438e-05	6.61402e-05	6.39808e-05	6.24579e-05	6.13442e-05	6.00182e-05	5.83551e-05	5.65171e-05	5.47633e-05	5.38666e-05	5.36026e-05	5.34694e-05
8	4.79382e-05	4.80536e-05	4.85804e-05	4.98777e-05	5.16022e-05	5.3481e-05	5.5193e-05	5.69993e-05	5.92874e-05	6.22365e-05	6.55192e-05	6.88183e-05	7.21372e-05	7.54161e-05	7.91381e-05	8.30081e-05	8.64209e-05	8.85113e-05	8.92997e-05	8.99501e-05	9.08932e-05	9.21583e-05	9.23161e-05	9.09505e-05	8.9298e-05	8.81324e-05	8.76961e-05	8.70924e-05	8.57813e-05	8.49117e-05	8.47698e-05	8.48065e-05	8.39614e-05	8.23701e-05	8.12204e-05	8.08242e-05	8.00972e-05	7.79373e-05	7.46828e-05	7.14831e-05	6.91378e-05	6.76362e-05	6.58915e-05	6.36453e-05	6.13262e-05	5.94234e-05	5.84715e-05	5.83924e-05	5.85508e-05
9	4.58662e-05	4.60665e-05	4.66684e-05	4.81453e-05	4.99883e-05	5.18804e-05	5.35309e-05	5.54144e-05	5.78195e-05	6.10701e-05	6.46364e-05	6.79815e-05	7.11653e-05	7.39664e-05	7.70106e-05	8.02783e-05	8.35074e-05	8.53678e-05	8.55167e-05	8.54491e-05	8.5963e-05	8.72586e-05	8.77859e-05	8.65901e-05	8.52799e-05	8.52303e-05	8.65856e-05	8.75107e-05	8.69792e-05	8.65131e-05	8.71731e-05	8.8281e-05	8.78011e-05	8.56683e-05	8.37655e-05	8.30957e-05	8.23104e-05	7.95284e-05	7.52725e-05	7.13414e-05	6.87633e-05	6.71543e-05	6.51391e-05	6.24987e-05	6.00476e-05	5.83457e-05	5.74442e-05	5.73035e-05	5.75532e-05
10	4.11336e-05	4.15464e-05	4.22333e-05	4.37792e-05	4.55815e-05	4.74027e-05	4.90384e-05	5.10019e-05	5.35051e-05	5.66932e-05	6.02067e-05	6.33623e-05	6.62489e-05	6.86047e-05	7.09298e-05	7.34473e-05	7.62593e-05	7.80345e-05	7.78105e-05	7.6667e-05	7.63146e-05	7.70305e-05	7.7394e-05	7.61413e-05	7.49095e-05	7.54542e-05	7.79471e-05	8.00969e-05	8.00987e-05	7.95778e-05	8.05332e-05	8.23801e-05	8.22122e-05	7.96228e-05	7.71459e-05	7.62964e-05	7.55318e-05	7.25641e-05	6.80452e-05	6.40719e-05	6.1815e-05	6.03747e-05	5.84076e-05	5.58665e-05	5.36824e-05	5.22307e-05	5.13047e-05	5.09122e-05	5.10885e-05
11	3.52922e-05	3.58838e-05	3.67408e-05	3.83223e-05	3.98431e-05	4.13225e-05	4.29213e-05	4.50938e-05	4.77642e-05	5.09821e-05	5.4349e-05	5.70386e-05	5.93442e-05	6.12542e-05	6.30179e-05	6.50155e-05	6.76745e-05	6.92194e-05	6.82204e-05	6.60895e-05	6.51381e-05	6.50056e-05	6.43953e-05	6.27339e-05	6.19302e-05	6.33006e-05	6.65689e-05	6.89062e-05	6.8503e-05	6.78704e-05	6.93586e-05	7.13433e-05	7.04102e-05	6.72093e-05	6.50659e-05	6.46103e-05	6.34037e-05	5.98303e-05	5.55665e-05	5.26333e-05	5.1332e-05	5.0217e-05	4.84082e-05	4.63445e-05	4.4846e-05	4.37506e-05	4.27423e-05	4.21582e-05	4.23782e-05
12	2.95465e-05	3.02559e-05	3.11471e-05	3.25199e-05	3.36772e-05	3.46723e-05	3.6004e-05	3.82667e-05	4.10015e-05	4.42419e-05	4.7565e-05	4.9984e-05	5.16932e-05	5.32006e-05	5.46847e-05	5.62786e-05	5.87724e-05	6.05017e-05	5.93297e-05	5.65636e-05	5.48417e-05	5.37905e-05	5.20971e-05	5.00682e-05	4.95798e-05	5.11537e-05	5.44904e-05	5.68529e-05	5.63525e-05	5.54431e-05	5.68128e-05	5.87275e-05	5.75352e-05	5.42354e-05	5.24265e-05	5.22483e-05	5.08489e-05	4.71053e-05	4.32985e-05	4.13026e-05	4.0792e-05	4.01775e-05	3.88234e-05	3.73598e-05	3.64469e-05	3.5669e-05	3.46169e-05	3.37922e-05	3.38832e-05
13	2.46773e-05	2.54098e-05	2.60412e-05	2.69823e-05	2.77501e-05	2.82351e-05	2.93026e-05	3.15382e-05	3.42002e-05	3.73962e-05	4.07736e-05	4.29813e-05	4.41809e-05	4.54722e-05	4.68314e-05	4.80716e-05	5.04768e-05	5.26875e-05	5.17038e-05	4.85023e-05	4.59733e-05	4.40934e-05	4.18306e-05	3.99329e-05	3.95095e-05	4.05937e-05	4.34455e-05	4.59953e-05	4.57512e-05	4.4413e-05	4.51813e-05	4.70236e-05	4.63422e-05	4.35024e-05	4.17622e-05	4.15333e-05	4.03026e-05	3.71138e-05	3.39445e-05	3.24134e-05	3.22277e-05	3.2141e-05	3.14626e-05	3.05332e-05	2.98916e-05	2.92385e-05	2.80681e-05	2.69655e-05	2.6829e-05
14	2.112e-05	2.17443e-05	2.20681e-05	2.26745e-05	2.29698e-05	2.29833e-05	2.40461e-05	2.64094e-05	2.90753e-05	3.23659e-05	3.58363e-05	3.75305e-05	3.81848e-05	3.93831e-05	4.05465e-05	4.16155e-05	4.42025e-05	4.63522e-05	4.46323e-05	4.10056e-05	3.83026e-05	3.57581e-05	3.32048e-05	3.18358e-05	3.17958e-05	3.28143e-05	3.53295e-05	3.75356e-05	3.68384e-05	3.5334e-05	3.61936e-05	3.76886e-05	3.67817e-05	3.43634e-05	3.31824e-05	3.29998e-05	3.15161e-05	2.86469e-05	2.63104e-05	2.55012e-05	2.56796e-05	2.59069e-05	2.57017e-05	2.52138e-05	2.48069e-05	2.41856e-05	2.28415e-05	2.16501e-05	2.1584e-05
15	1.83754e-05	1.89266e-05	1.89871e-05	1.92872e-05	1.92186e-05	1.88786e-05	1.97764e-05	2.21396e-05	2.48173e-05	2.81206e-05	3.17118e-05	3.32363e-05	3.34636e-05	3.44506e-05	3.54312e-05	3.63603e-05	3.88546e-05	4.09205e-05	3.88418e-05	3.49724e-05	3.22218e-05	2.93213e-05	2.66481e-05	2.56774e-05	2.59613e-05	2.6924e-05	2.89934e-05	3.08431e-05	2.99645e-05	2.84115e-05	2.92228e-05	3.03842e-05	2.94078e-05	2.7454e-05	2.66799e-05	2.65243e-05	2.49638e-05	2.24331e-05	2.07357e-05	2.04042e-05	2.07903e-05	2.12016e-05	2.13522e-05	2.12352e-05	2.10184e-05	2.0463e-05	1.90904e-05	1.78369e-05	1.77603e-05
16	1.61825e-05	1.66782e-05	1.64992e-05	1.65413e-05	1.62742e-05	1.57002e-05	1.6345e-05	1.85729e-05	2.12357e-05	2.44133e-05	2.81325e-05	2.9686e-05	2.96845e-05	3.04087e-05	3.1237e-05	3.19897e-05	3.4097e-05	3.61341e-05	3.41356e-05	3.0241e-05	2.74818e-05	2.45041e-05	2.1966e-05	2.12233e-05	2.15956e-05	2.23595e-05	2.38792e-05	2.55632e-05	2.4853e-05	2.32782e-05	2.38255e-05	2.47614e-05	2.409e-05	2.25803e-05	2.19052e-05	2.17371e-05	2.03744e-05	1.83041e-05	1.70172e-05	1.68424e-05	1.72521e-05	1.77825e-05	1.82037e-05	1.83485e-05	1.82369e-05	1.77853e-05	1.64895e-05	1.51836e-05	1.50083e-05
17	1.45241e-05	1.48626e-05	1.44682e-05	1.43808e-05	1.39377e-05	1.32851e-05	1.39133e-05	1.60786e-05	1.8715e-05	2.17896e-05	2.55222e-05	2.67723e-05	2.67144e-05	2.72651e-05	2.78843e-05	2.84919e-05	3.02863e-05	3.19588e-05	2.96151e-05	2.58865e-05	2.33344e-05	2.03979e-05	1.83246e-05	1.79022e-05	1.83618e-05	1.90394e-05	2.01815e-05	2.16017e-05	2.07473e-05	1.93417e-05	1.99083e-05	2.05469e-05	1.99977e-05	1.87945e-05	1.83054e-05	1.80955e-05	1.68115e-05	1.51533e-05	1.43012e-05	1.43176e-05	1.47365e-05	1.52891e-05	1.58479e-05	1.61334e-05	1.60822e-05	1.56622e-05	1.43918e-05	1.31669e-05	1.30605e-05
18	1.30965e-05	1.33285e-05	1.28824e-05	1.26453e-05	1.21809e-05	1.15211e-05	1.19848e-05	1.38417e-05	1.63319e-05	1.92113e-05	2.27361e-05	2.41706e-05	2.42041e-05	2.46162e-05	2.50118e-05	2.54635e-05	2.67708e-05	2.80914e-05	2.6067e-05	2.26316e-05	2.01842e-05	1.74794e-05	1.56535e-05	1.5366e-05	1.57888e-05	1.64192e-05	1.72702e-05	1.83873e-05	1.77303e-05	1.64761e-05	1.68334e-05	1.72963e-05	1.69259e-05	1.60442e-05	1.55982e-05	1.5357e-05	1.42782e-05	1.29578e-05	1.23296e-05	1.2411e-05	1.28059e-05	1.33178e-05	1.3902e-05	1.43139e-05	1.43609e-05	1.40243e-05	1.29216e-05	1.17669e-05	1.15826e-05
19	1.18061e-05	1.20545e-05	1.16634e-05	1.12686e-05	1.09425e-05	1.02245e-05	1.0352e-05	1.16608e-05	1.39518e-05	1.64553e-05	1.9761e-05	2.18625e-05	2.1991e-05	2.23172e-05	2.24702e-05	2.27681e-05	2.34197e-05	2.46841e-05	2.36138e-05	2.0407e-05	1.80357e-05	1.56277e-05	1.372e-05	1.33926e-05	1.36757e-05	1.43203e-05	1.48841e-05	1.58034e-05	1.56837e-05	1.43809e-05	1.4375e-05	1.48065e-05	1.46787e-05	1.41104e-05	1.35685e-05	1.33846e-05	1.25915e-05	1.14941e-05	1.08764e-05	1.09188e-05	1.1261e-05	1.17081e-05	1.22442e-05	1.27984e-05	1.29725e-05	1.28076e-05	1.1983e-05	1.08094e-05	1.04038e-05
20	1.07545e-05	1.09061e-05	1.04295e-05	1.01091e-05	9.748e-06	9.11286e-06	9.26766e-06	1.04386e-05	1.26218e-05	1.48592e-05	1.80822e-05	1.98782e-05	2.00976e-05	2.03056e-05	2.02729e-05	2.04062e-05	2.07793e-05	2.18296e-05	2.06253e-05	1.7735e-05	1.56886e-05	1.34488e-05	1.19969e-05	1.18395e-05	1.21603e-05	1.28101e-05	1.31937e-05	1.39839e-05	1.36976e-05	1.25176e-05	1.25983e-05	1.28729e-05	1.28386e-05	1.23767e-05	1.19226e-05	1.17271e-05	1.09867e-05	1.01185e-05	9.69528e-06	9.82049e-06	1.01505e-05	1.05437e-05	1.1072e-05	1.16347e-05	1.18048e-05	1.16563e-05	1.0843e-05	9.79234e-06	9.47519e-06
21	9.84096e-06	9.8293e-06	9.28353e-06	9.07148e-06	8.67691e-06	8.18894e-06	8.49398e-06	9.63492e-06	1.16647e-05	1.37113e-05	1.67118e-05	1.79819e-05	1.83009e-05	1.84911e-05	1.83117e-05	1.82995e-05	1.85288e-05	1.92195e-05	1.76401e-05	1.51593e-05	1.34568e-05	1.14033e-05	1.0495e-05	1.05647e-05	1.09502e-05	1.15896e-05	1.19063e-05	1.25263e-05	1.19049e-05	1.09215e-05	1.11668e-05	1.12744e-05	1.12552e-05	1.08496e-05	1.05271e-05	1.02896e-05	9.53288e-06	8.87888e-06	8.67649e-06	8.92523e-06	9.25438e-06	9.60873e-06	1.011e-05	1.06222e-05	1.07603e-05	1.05673e-05	9.71981e-06	8.84825e-06	8.6988e-06
22	8.95337e-06	8.88717e-06	8.38435e-06	8.18882e-06	7.91361e-06	7.48481e-06	7.74217e-06	8.61518e-06	1.04282e-05	1.21723e-05	1.48538e-05	1.61606e-05	1.65639e-05	1.68161e-05	1.65045e-05	1.63801e-05	1.63228e-05	1.68615e-05	1.55869e-05	1.34191e-05	1.19324e-05	1.01251e-05	9.35549e-06	9.49194e-06	9.83031e-06	1.0486e-05	1.07313e-05	1.12007e-05	1.06499e-05	9.6946e-06	9.87583e-06	9.94988e-06	9.99272e-06	9.69709e-06	9.38134e-06	9.16901e-06	8.49829e-06	7.97255e-06	7.82531e-06	8.11459e-06	8.42069e-06	8.73215e-06	9.1615e-06	9.66674e-06	9.83325e-06	9.68153e-06	8.94819e-06	8.16143e-06	8.0062e-06
23	8.13384e-06	8.0287e-06	7.54659e-06	7.41105e-06	7.21498e-06	6.88018e-06	7.117e-06	7.80942e-06	9.43572e-06	1.09008e-05	1.33074e-05	1.44819e-05	1.49704e-05	1.5218e-05	1.48493e-05	1.46252e-05	1.43874e-05	1.48061e-05	1.37026e-05	1.18389e-05	1.0559e-05	8.96587e-06	8.39483e-06	8.57463e-06	8.9046e-06	9.55591e-06	9.74267e-06	1.01005e-05	9.53083e-06	8.63911e-06	8.7928e-06	8.83181e-06	8.93425e-06	8.6939e-06	8.40001e-06	8.18983e-06	7.58505e-06	7.17018e-06	7.08825e-06	7.41352e-06	7.70509e-06	7.97405e-06	8.35527e-06	8.83042e-06	9.00081e-06	8.86479e-06	8.20194e-06	7.51803e-06	7.38966e-06
24	7.45199e-06	7.27256e-06	6.90002e-06	6.66046e-06	6.64939e-06	6.34399e-06	6.53297e-06	6.98796e-06	8.27722e-06	9.57091e-06	1.14554e-05	1.28552e-05	1.3272e-05	1.37906e-05	1.33826e-05	1.31677e-05	1.27167e-05	1.2959e-05	1.22878e-05	1.07138e-05	9.55289e-06	8.22611e-06	7.52512e-06	7.74943e-06	7.98687e-06	8.61819e-06	8.87232e-06	9.10636e-06	8.7522e-06	7.82891e-06	7.81539e-06	7.87694e-06	7.97121e-06	7.88368e-06	7.56674e-06	7.4042e-06	6.87293e-06	6.50405e-06	6.3889e-06	6.71477e-06	6.99906e-06	7.2744e-06	7.5371e-06	8.00396e-06	8.21778e-06	8.15365e-06	7.66166e-06	7.00354e-06	6.82593e-06
25	6.82483e-06	6.59644e-06	6.32006e-06	6.01734e-06	6.15621e-06	5.88089e-06	6.00547e-06	6.26283e-06	7.24288e-06	8.36815e-06	9.80697e-06	1.13802e-05	1.17674e-05	1.248e-05	1.20632e-05	1.1834e-05	1.12536e-05	1.13767e-05	1.11016e-05	9.79275e-06	8.72966e-06	7.62603e-06	6.80565e-06	7.02841e-06	7.18863e-06	7.78312e-06	8.09558e-06	8.23836e-06	8.07403e-06	7.14296e-06	6.98017e-06	7.07354e-06	7.15224e-06	7.17669e-06	6.85121e-06	6.72656e-06	6.27148e-06	5.93199e-06	5.78914e-06	6.09894e-06	6.36963e-06	6.64159e-06	6.81301e-06	7.26049e-06	7.51516e-06	7.51742e-06	7.17706e-06	6.54746e-06	6.31922e-06
26	6.17592e-06	5.94161e-06	5.63819e-06	5.45375e-06	5.61047e-06	5.42627e-06	5.58437e-06	5.80584e-06	6.714e-06	7.60643e-06	8.92644e-06	1.01393e-05	1.05734e-05	1.12097e-05	1.07769e-05	1.04892e-05	9.90708e-06	1.00305e-05	9.67783e-06	8.58756e-06	7.71208e-06	6.71312e-06	6.16396e-06	6.4084e-06	6.58608e-06	7.15963e-06	7.40511e-06	7.51616e-06	7.20633e-06	6.3716e-06	6.29638e-06	6.34723e-06	6.46679e-06	6.44444e-06	6.1571e-06	6.02394e-06	5.57839e-06	5.33192e-06	5.26704e-06	5.62646e-06	5.86175e-06	6.10067e-06	6.26198e-06	6.66329e-06	6.89207e-06	6.85987e-06	6.52125e-06	5.99519e-06	5.83995e-06
27	5.5771e-06	5.35068e-06	5.02949e-06	4.9599e-06	5.11122e-06	5.01834e-06	5.19355e-06	5.40275e-06	6.24441e-06	6.95007e-06	8.14624e-06	9.04044e-06	9.52007e-06	1.00137e-05	9.61343e-06	9.27134e-06	8.73392e-06	8.84895e-06	8.44423e-06	7.51749e-06	6.79249e-06	5.91728e-06	5.60669e-06	5.8503e-06	6.05977e-06	6.59648e-06	6.77714e-06	6.84186e-06	6.41854e-06	5.69477e-06	5.68631e-06	5.72289e-06	5.86176e-06	5.78928e-06	5.53351e-06	5.37804e-06	4.96686e-06	4.79564e-06	4.81638e-06	5.19254e-06	5.40919e-06	5.5986e-06	5.77342e-06	6.12306e-06	6.31489e-06	6.25507e-06	5.90772e-06	5.48995e-06	5.40017e-06
28	5.03236e-06	4.82782e-06	4.48099e-06	4.56296e-06	4.66297e-06	4.67718e-06	4.82551e-06	5.03966e-06	5.82084e-06	6.34074e-06	7.46181e-06	8.04114e-06	8.65337e-06	8.90586e-06	8.60846e-06	8.14499e-06	7.72729e-06	7.83722e-06	7.39434e-06	6.6198e-06	6.01269e-06	5.24082e-06	5.16046e-06	5.34351e-06	5.61186e-06	6.08481e-06	6.20121e-06	6.22662e-06	5.694e-06	5.12063e-06	5.15797e-06	5.19486e-06	5.34048e-06	5.19712e-06	4.9913e-06	4.79583e-06	4.44655e-06	4.33391e-06	4.44624e-06	4.80803e-06	5.01025e-06	5.1286e-06	5.35548e-06	5.62399e-06	5.79482e-06	5.70857e-06	5.34299e-06	5.05523e-06	4.99994e-06
29	4.59979e-06	4.39001e-06	4.05382e-06	4.10106e-06	4.27528e-06	4.30565e-06	4.44783e-06	4.60716e-06	5.28474e-06	5.66146e-06	6.60654e-06	7.11806e-06	7.62463e-06	7.99954e-06	7.71244e-06	7.27159e-06	6.82104e-06	6.94812e-06	6.58596e-06	5.93842e-06	5.43421e-06	4.74802e-06	4.66706e-06	4.86533e-06	5.08611e-06	5.5336e-06	5.65254e-06	5.67804e-06	5.19487e-06	4.62743e-06	4.66284e-06	4.69302e-06	4.8483e-06	4.7128e-06	4.49969e-06	4.34797e-06	4.00253e-06	3.92047e-06	4.01714e-06	4.41008e-06	4.5701e-06	4.70251e-06	4.87062e-06	5.11657e-06	5.30294e-06	5.20568e-06	4.92321e-06	4.65955e-06	4.59189e-06
30	3.28187e-06	3.10404e-06	2.89261e-06	2.81087e-06	3.03294e-06	3.02851e-06	3.13885e-06	3.21336e-06	3.60981e-06	3.88443e-06	4.40618e-06	4.89733e-06	5.11588e-06	5.60945e-06	5.37213e-06	5.13024e-06	4.71765e-06	4.7882e-06	4.64147e-06	4.21914e-06	3.86352e-06	3.41724e-06	3.2304e-06	3.41535e-06	3.51325e-06	3.83913e-06	3.97886e-06	3.99586e-06	3.75087e-06	3.2779e-06	3.24905e-06	3.27926e-06	3.38768e-06	3.3406e-06	3.15402e-06	3.08727e-06	2.82145e-06	2.75224e-06	2.77534e-06	3.08315e-06	3.18748e-06	3.32762e-06	3.3723e-06	3.57761e-06	3.72874e-06	3.67207e-06	3.55092e-06	3.3146e-06	3.24351e-06
[truncated: 12 more columns]

## Sheet: Fig. 2A Right
time frequency	0	0.01	0.02	0.03	0.04	0.05	0.06	0.07	0.08	0.09	0.1	0.11	0.12	0.13	0.14	0.15	0.16	0.17	0.18	0.19	0.2	0.21	0.22	0.23	0.24	0.25	0.26	0.27	0.28	0.29	0.3	0.31	0.32	0.33	0.34	0.35	0.36	0.37	0.38	0.39	0.4	0.41	0.42	0.43	0.44	0.45	0.46	0.47	0.48
1	1.22856e-05	1.24073e-05	1.25473e-05	1.26353e-05	1.26956e-05	1.27826e-05	1.29091e-05	1.29887e-05	1.31787e-05	1.32797e-05	1.33055e-05	1.33778e-05	1.34218e-05	1.35962e-05	1.36026e-05	1.36689e-05	1.37199e-05	1.3694e-05	1.36911e-05	1.38036e-05	1.38537e-05	1.38241e-05	1.38602e-05	1.38645e-05	1.39597e-05	1.38721e-05	1.37786e-05	1.37566e-05	1.37457e-05	1.37414e-05	1.37477e-05	1.37989e-05	1.38041e-05	1.37718e-05	1.37182e-05	1.37088e-05	1.36337e-05	1.35957e-05	1.34649e-05	1.33116e-05	1.32662e-05	1.3236e-05	1.3181e-05	1.30752e-05	1.30161e-05	1.295e-05	1.29279e-05	1.27998e-05	1.26794e-05
2	3.34548e-05	3.38809e-05	3.4261e-05	3.44224e-05	3.45531e-05	3.46935e-05	3.49405e-05	3.52199e-05	3.55969e-05	3.58672e-05	3.59463e-05	3.61901e-05	3.62921e-05	3.66161e-05	3.68531e-05	3.70986e-05	3.72367e-05	3.71937e-05	3.72274e-05	3.73331e-05	3.73835e-05	3.74014e-05	3.75555e-05	3.7574e-05	3.76961e-05	3.762e-05	3.76083e-05	3.75616e-05	3.7526e-05	3.75976e-05	3.76779e-05	3.76664e-05	3.75926e-05	3.7555e-05	3.73429e-05	3.7247e-05	3.7069e-05	3.69558e-05	3.66834e-05	3.62777e-05	3.59961e-05	3.57593e-05	3.54992e-05	3.52727e-05	3.51976e-05	3.50319e-05	3.4867e-05	3.46218e-05	3.43634e-05
3	5.06628e-05	5.12296e-05	5.17046e-05	5.19172e-05	5.2073e-05	5.2222e-05	5.26051e-05	5.31954e-05	5.36924e-05	5.42317e-05	5.45167e-05	5.49329e-05	5.5281e-05	5.5914e-05	5.66477e-05	5.72312e-05	5.75444e-05	5.76576e-05	5.78175e-05	5.78388e-05	5.78559e-05	5.78691e-05	5.78365e-05	5.77183e-05	5.76156e-05	5.74645e-05	5.72811e-05	5.69695e-05	5.679e-05	5.67498e-05	5.65741e-05	5.61652e-05	5.57157e-05	5.51972e-05	5.45594e-05	5.41153e-05	5.37492e-05	5.33181e-05	5.28333e-05	5.22655e-05	5.17988e-05	5.13575e-05	5.08942e-05	5.05741e-05	5.0465e-05	5.03386e-05	5.01271e-05	4.98494e-05	4.9462e-05
4	5.49082e-05	5.54392e-05	5.61283e-05	5.67306e-05	5.72846e-05	5.78059e-05	5.86165e-05	5.96338e-05	6.05487e-05	6.15442e-05	6.24424e-05	6.34036e-05	6.44435e-05	6.56189e-05	6.68215e-05	6.80316e-05	6.89234e-05	6.96416e-05	7.03072e-05	7.09286e-05	7.12966e-05	7.12019e-05	7.07391e-05	7.03183e-05	6.98485e-05	6.92e-05	6.83153e-05	6.73565e-05	6.64689e-05	6.55445e-05	6.42747e-05	6.27868e-05	6.12868e-05	5.97239e-05	5.83128e-05	5.73266e-05	5.66629e-05	5.58711e-05	5.51475e-05	5.45319e-05	5.41918e-05	5.38687e-05	5.35241e-05	5.33031e-05	5.34054e-05	5.35991e-05	5.36774e-05	5.36005e-05	5.33848e-05
5	5.2577e-05	5.31846e-05	5.42559e-05	5.54717e-05	5.66734e-05	5.77725e-05	5.91528e-05	6.06769e-05	6.2267e-05	6.38229e-05	6.56214e-05	6.75646e-05	6.95689e-05	7.14383e-05	7.33392e-05	7.54876e-05	7.72488e-05	7.88821e-05	8.05838e-05	8.24305e-05	8.35438e-05	8.36123e-05	8.29374e-05	8.2088e-05	8.10583e-05	7.96536e-05	7.79738e-05	7.62128e-05	7.42288e-05	7.17992e-05	6.88756e-05	6.58844e-05	6.30661e-05	6.04891e-05	5.84147e-05	5.70968e-05	5.62436e-05	5.53985e-05	5.45996e-05	5.4045e-05	5.38605e-05	5.38961e-05	5.4072e-05	5.43435e-05	5.4879e-05	5.54217e-05	5.57277e-05	5.57169e-05	5.57654e-05
6	5.04331e-05	5.11483e-05	5.24131e-05	5.39928e-05	5.54766e-05	5.68815e-05	5.85382e-05	6.04195e-05	6.26389e-05	6.49207e-05	6.75212e-05	7.03077e-05	7.31315e-05	7.58546e-05	7.88181e-05	8.17351e-05	8.40404e-05	8.6453e-05	8.92521e-05	9.21313e-05	9.42103e-05	9.49527e-05	9.44137e-05	9.31939e-05	9.18033e-05	9.03881e-05	8.87371e-05	8.64554e-05	8.33804e-05	7.96197e-05	7.55215e-05	7.15037e-05	6.7768e-05	6.44636e-05	6.19897e-05	6.04832e-05	5.94978e-05	5.84773e-05	5.74191e-05	5.66145e-05	5.62344e-05	5.64324e-05	5.70271e-05	5.76414e-05	5.80959e-05	5.8431e-05	5.85376e-05	5.82778e-05	5.81989e-05
7	4.98882e-05	5.04579e-05	5.15338e-05	5.30051e-05	5.44019e-05	5.58441e-05	5.75184e-05	5.94938e-05	6.21082e-05	6.51819e-05	6.83674e-05	7.14817e-05	7.45777e-05	7.77941e-05	8.14004e-05	8.47155e-05	8.72013e-05	8.96414e-05	9.25362e-05	9.58831e-05	9.92288e-05	0.000101393	0.000101685	0.000100823	0.000100009	9.98525e-05	9.96664e-05	9.81096e-05	9.48253e-05	9.06386e-05	8.64831e-05	8.26652e-05	7.88961e-05	7.50249e-05	7.16914e-05	6.94628e-05	6.81648e-05	6.68144e-05	6.49341e-05	6.30212e-05	6.17958e-05	6.16277e-05	6.20795e-05	6.22984e-05	6.20059e-05	6.15811e-05	6.12481e-05	6.08019e-05	6.03804e-05
8	4.90276e-05	4.93404e-05	5.00184e-05	5.11123e-05	5.24561e-05	5.39974e-05	5.57268e-05	5.77976e-05	6.06553e-05	6.43407e-05	6.80074e-05	7.09298e-05	7.3539e-05	7.64642e-05	7.98857e-05	8.31096e-05	8.52298e-05	8.66982e-05	8.86414e-05	9.18904e-05	9.61815e-05	9.97357e-05	0.000101161	0.000101066	0.000101435	0.000103319	0.000105377	0.000105335	0.000102466	9.86343e-05	9.54818e-05	9.30416e-05	8.9873e-05	8.54115e-05	8.10147e-05	7.81602e-05	7.68634e-05	7.52425e-05	7.21901e-05	6.88316e-05	6.67515e-05	6.62478e-05	6.61809e-05	6.54542e-05	6.42771e-05	6.32696e-05	6.27308e-05	6.23071e-05	6.15958e-05
9	4.57865e-05	4.58861e-05	4.62285e-05	4.68944e-05	4.80804e-05	4.9795e-05	5.18048e-05	5.40914e-05	5.70603e-05	6.1036e-05	6.51744e-05	6.80648e-05	7.00074e-05	7.21457e-05	7.48696e-05	7.75775e-05	7.89294e-05	7.92094e-05	7.99256e-05	8.2321e-05	8.62641e-05	9.00984e-05	9.21763e-05	9.26013e-05	9.35392e-05	9.67026e-05	0.000100495	0.000101962	9.97208e-05	9.6278e-05	9.41624e-05	9.32765e-05	9.11615e-05	8.66141e-05	8.16626e-05	7.86502e-05	7.77722e-05	7.63041e-05	7.26625e-05	6.83624e-05	6.57736e-05	6.52878e-05	6.49358e-05	6.34447e-05	6.14915e-05	6.02213e-05	5.98532e-05	5.96176e-05	5.8783e-05
10	4.02045e-05	4.00853e-05	4.01059e-05	4.03028e-05	4.12291e-05	4.30944e-05	4.55062e-05	4.79435e-05	5.08749e-05	5.49856e-05	5.95408e-05	6.25962e-05	6.4014e-05	6.54027e-05	6.74621e-05	6.95291e-05	7.01672e-05	6.9689e-05	6.94017e-05	7.04618e-05	7.30519e-05	7.63311e-05	7.8433e-05	7.89024e-05	7.95262e-05	8.27629e-05	8.73953e-05	8.99036e-05	8.83233e-05	8.51708e-05	8.36693e-05	8.36902e-05	8.25215e-05	7.84276e-05	7.35519e-05	7.07391e-05	7.03767e-05	6.94824e-05	6.59761e-05	6.15049e-05	5.88427e-05	5.84833e-05	5.80246e-05	5.61372e-05	5.38316e-05	5.26382e-05	5.25494e-05	5.24627e-05	5.16916e-05
11	3.36811e-05	3.3436e-05	3.31274e-05	3.29823e-05	3.39516e-05	3.61254e-05	3.88695e-05	4.1435e-05	4.45478e-05	4.90264e-05	5.37473e-05	5.63084e-05	5.70256e-05	5.81472e-05	5.99193e-05	6.10911e-05	6.08614e-05	6.00236e-05	5.93781e-05	5.95498e-05	6.08852e-05	6.31247e-05	6.44024e-05	6.42035e-05	6.45473e-05	6.79855e-05	7.2673e-05	7.46075e-05	7.26176e-05	6.99925e-05	6.93684e-05	6.96033e-05	6.81115e-05	6.40772e-05	6.00423e-05	5.84639e-05	5.8903e-05	5.80853e-05	5.45197e-05	5.06209e-05	4.8977e-05	4.90185e-05	4.80781e-05	4.57084e-05	4.37036e-05	4.32051e-05	4.33893e-05	4.31756e-05	4.24693e-05
12	2.7758e-05	2.74306e-05	2.69025e-05	2.64758e-05	2.7266e-05	2.94311e-05	3.22533e-05	3.50045e-05	3.82239e-05	4.2725e-05	4.74804e-05	4.99324e-05	5.02676e-05	5.11113e-05	5.2719e-05	5.3302e-05	5.25624e-05	5.17293e-05	5.1085e-05	5.06236e-05	5.07811e-05	5.16715e-05	5.20417e-05	5.12999e-05	5.11374e-05	5.40591e-05	5.82927e-05	5.98393e-05	5.78025e-05	5.56546e-05	5.5376e-05	5.54048e-05	5.35469e-05	4.98526e-05	4.67353e-05	4.60063e-05	4.69809e-05	4.65181e-05	4.34683e-05	4.02913e-05	3.93716e-05	3.96815e-05	3.85763e-05	3.60711e-05	3.43479e-05	3.42885e-05	3.46238e-05	3.43344e-05	3.37645e-05
13	2.30483e-05	2.26588e-05	2.19919e-05	2.13054e-05	2.17475e-05	2.35697e-05	2.62723e-05	2.92189e-05	3.22743e-05	3.63857e-05	4.11949e-05	4.38959e-05	4.40922e-05	4.4601e-05	4.59695e-05	4.63037e-05	4.56777e-05	4.5032e-05	4.42464e-05	4.31417e-05	4.21465e-05	4.18785e-05	4.18279e-05	4.08938e-05	4.00142e-05	4.18652e-05	4.56245e-05	4.75435e-05	4.62272e-05	4.43599e-05	4.37636e-05	4.33898e-05	4.17355e-05	3.89272e-05	3.64264e-05	3.57615e-05	3.6889e-05	3.72036e-05	3.51774e-05	3.25724e-05	3.16344e-05	3.18945e-05	3.10265e-05	2.87822e-05	2.722e-05	2.71465e-05	2.74296e-05	2.72569e-05	2.69459e-05
14	1.93762e-05	1.90315e-05	1.82386e-05	1.74849e-05	1.79936e-05	1.96724e-05	2.22059e-05	2.52694e-05	2.82417e-05	3.2164e-05	3.68898e-05	3.90539e-05	3.8803e-05	3.94134e-05	4.04764e-05	4.02887e-05	3.98792e-05	3.94545e-05	3.84003e-05	3.68942e-05	3.51756e-05	3.42057e-05	3.38245e-05	3.25435e-05	3.14979e-05	3.32417e-05	3.65962e-05	3.81078e-05	3.69652e-05	3.54997e-05	3.48544e-05	3.39275e-05	3.2156e-05	2.99965e-05	2.82114e-05	2.80222e-05	2.93748e-05	2.98542e-05	2.82735e-05	2.63644e-05	2.57664e-05	2.59402e-05	2.49739e-05	2.29111e-05	2.18387e-05	2.19449e-05	2.20321e-05	2.19285e-05	2.18773e-05
15	1.66691e-05	1.64215e-05	1.56399e-05	1.48703e-05	1.53548e-05	1.68208e-05	1.90072e-05	2.19922e-05	2.49207e-05	2.85185e-05	3.30423e-05	3.49737e-05	3.44335e-05	3.50426e-05	3.58424e-05	3.52892e-05	3.50427e-05	3.48748e-05	3.365e-05	3.19217e-05	2.98255e-05	2.83092e-05	2.76683e-05	2.62704e-05	2.52043e-05	2.68199e-05	2.97413e-05	3.10006e-05	3.01256e-05	2.89948e-05	2.83038e-05	2.69821e-05	2.51156e-05	2.34431e-05	2.22194e-05	2.23065e-05	2.36978e-05	2.42975e-05	2.31556e-05	2.18529e-05	2.14903e-05	2.15336e-05	2.05887e-05	1.87828e-05	1.80347e-05	1.82423e-05	1.817e-05	1.81005e-05	1.82499e-05
16	1.47156e-05	1.45932e-05	1.39277e-05	1.31366e-05	1.34358e-05	1.45826e-05	1.63242e-05	1.91283e-05	2.19213e-05	2.50065e-05	2.93295e-05	3.13906e-05	3.07991e-05	3.12398e-05	3.1819e-05	3.11716e-05	3.10922e-05	3.10997e-05	2.97268e-05	2.79365e-05	2.56196e-05	2.36801e-05	2.29512e-05	2.16743e-05	2.06106e-05	2.18795e-05	2.44173e-05	2.5788e-05	2.53266e-05	2.43333e-05	2.35061e-05	2.20118e-05	2.02775e-05	1.90369e-05	1.81205e-05	1.81543e-05	1.94356e-05	2.03042e-05	1.96737e-05	1.87792e-05	1.83913e-05	1.83221e-05	1.76347e-05	1.61182e-05	1.54728e-05	1.56384e-05	1.5473e-05	1.54729e-05	1.57358e-05
17	1.3198e-05	1.32082e-05	1.26193e-05	1.18962e-05	1.21552e-05	1.30832e-05	1.45023e-05	1.71377e-05	1.96754e-05	2.23888e-05	2.64985e-05	2.82551e-05	2.76375e-05	2.80671e-05	2.83341e-05	2.76302e-05	2.7781e-05	2.77632e-05	2.61498e-05	2.43862e-05	2.19042e-05	1.9887e-05	1.92091e-05	1.80206e-05	1.72299e-05	1.85136e-05	2.07505e-05	2.19989e-05	2.16541e-05	2.07246e-05	1.98127e-05	1.81864e-05	1.66748e-05	1.57753e-05	1.51123e-05	1.52054e-05	1.64386e-05	1.73674e-05	1.69893e-05	1.64327e-05	1.60573e-05	1.59282e-05	1.5388e-05	1.40913e-05	1.36698e-05	1.38072e-05	1.35515e-05	1.36554e-05	1.39529e-05
18	1.19758e-05	1.20531e-05	1.1646e-05	1.10375e-05	1.11397e-05	1.18328e-05	1.29322e-05	1.51509e-05	1.7449e-05	1.97856e-05	2.33844e-05	2.52461e-05	2.48997e-05	2.51967e-05	2.52951e-05	2.46486e-05	2.48016e-05	2.48495e-05	2.33179e-05	2.15618e-05	1.91837e-05	1.70828e-05	1.63085e-05	1.53174e-05	1.47062e-05	1.58047e-05	1.77371e-05	1.89711e-05	1.88813e-05	1.8064e-05	1.71011e-05	1.5538e-05	1.41616e-05	1.34457e-05	1.29428e-05	1.29952e-05	1.4011e-05	1.4978e-05	1.4933e-05	1.46324e-05	1.43024e-05	1.40902e-05	1.37041e-05	1.27025e-05	1.23329e-05	1.24316e-05	1.21801e-05	1.22728e-05	1.25689e-05
19	1.0938e-05	1.10685e-05	1.09188e-05	1.04006e-05	1.02247e-05	1.0691e-05	1.14019e-05	1.30361e-05	1.51829e-05	1.70199e-05	1.99862e-05	2.24846e-05	2.24883e-05	2.25831e-05	2.27064e-05	2.21367e-05	2.20667e-05	2.24261e-05	2.12015e-05	1.94874e-05	1.74255e-05	1.50853e-05	1.41387e-05	1.33974e-05	1.27607e-05	1.34469e-05	1.5118e-05	1.6485e-05	1.68303e-05	1.61545e-05	1.52328e-05	1.38506e-05	1.24614e-05	1.18192e-05	1.13842e-05	1.12726e-05	1.19352e-05	1.30139e-05	1.33475e-05	1.32354e-05	1.29793e-05	1.26515e-05	1.2477e-05	1.17638e-05	1.12679e-05	1.1377e-05	1.1164e-05	1.11395e-05	1.14398e-05
20	1.00223e-05	1.02316e-05	1.01318e-05	9.6726e-06	9.48266e-06	9.84858e-06	1.03809e-05	1.18189e-05	1.3662e-05	1.51525e-05	1.79636e-05	2.01973e-05	2.02041e-05	2.03237e-05	2.02789e-05	1.97393e-05	1.9785e-05	2.01098e-05	1.87953e-05	1.72528e-05	1.52044e-05	1.30393e-05	1.22586e-05	1.16103e-05	1.12136e-05	1.19553e-05	1.34751e-05	1.47135e-05	1.50469e-05	1.43457e-05	1.34665e-05	1.21096e-05	1.09402e-05	1.04459e-05	1.00795e-05	9.99009e-06	1.06063e-05	1.16691e-05	1.2025e-05	1.20202e-05	1.17365e-05	1.14284e-05	1.13444e-05	1.07295e-05	1.03865e-05	1.04839e-05	1.02443e-05	1.02696e-05	1.05164e-05
21	9.16964e-06	9.42695e-06	9.31043e-06	8.94871e-06	8.83351e-06	9.1449e-06	9.62015e-06	1.09595e-05	1.2426e-05	1.37015e-05	1.63434e-05	1.80426e-05	1.80384e-05	1.82592e-05	1.79962e-05	1.75131e-05	1.77212e-05	1.78686e-05	1.64469e-05	1.50962e-05	1.30606e-05	1.1224e-05	1.06426e-05	1.00176e-05	9.91288e-06	1.0819e-05	1.22224e-05	1.32319e-05	1.34138e-05	1.26831e-05	1.18589e-05	1.05407e-05	9.64075e-06	9.27432e-06	8.96582e-06	8.97418e-06	9.60969e-06	1.05663e-05	1.0843e-05	1.08957e-05	1.05841e-05	1.03325e-05	1.02651e-05	9.72177e-06	9.58904e-06	9.66397e-06	9.40857e-06	9.50939e-06	9.68089e-06
22	8.36991e-06	8.63926e-06	8.60163e-06	8.34339e-06	8.17707e-06	8.41915e-06	8.76899e-06	9.82107e-06	1.1031e-05	1.20274e-05	1.42631e-05	1.59794e-05	1.61103e-05	1.63194e-05	1.60159e-05	1.56083e-05	1.57334e-05	1.59416e-05	1.46842e-05	1.34919e-05	1.17093e-05	9.97091e-06	9.40528e-06	8.84517e-06	8.79299e-06	9.59196e-06	1.08791e-05	1.17991e-05	1.20532e-05	1.13945e-05	1.06897e-05	9.52734e-06	8.71165e-06	8.37827e-06	8.08873e-06	8.08901e-06	8.58258e-06	9.49095e-06	9.81013e-06	9.89907e-06	9.6299e-06	9.37146e-06	9.36909e-06	8.95097e-06	8.8343e-06	8.92408e-06	8.69189e-06	8.75092e-06	8.88725e-06
23	7.63328e-06	7.89802e-06	7.9097e-06	7.72669e-06	7.55345e-06	7.75361e-06	8.02385e-06	8.87448e-06	9.84203e-06	1.06059e-05	1.2559e-05	1.41594e-05	1.43713e-05	1.45498e-05	1.42012e-05	1.38665e-05	1.39642e-05	1.41708e-05	1.30252e-05	1.20115e-05	1.04302e-05	8.86863e-06	8.35725e-06	7.84712e-06	7.85165e-06	8.5808e-06	9.76992e-06	1.05875e-05	1.08369e-05	1.02176e-05	9.62958e-06	8.60773e-06	7.91147e-06	7.60401e-06	7.33043e-06	7.33584e-06	7.74805e-06	8.59591e-06	8.89958e-06	8.99251e-06	8.73145e-06	8.49861e-06	8.54453e-06	8.21231e-06	8.13391e-06	8.21774e-06	8.00587e-06	8.04797e-06	8.14403e-06
24	6.92368e-06	7.16307e-06	7.22035e-06	7.17125e-06	6.9738e-06	7.10918e-06	7.30369e-06	7.9119e-06	8.68216e-06	9.27941e-06	1.06559e-05	1.23459e-05	1.27151e-05	1.29677e-05	1.2637e-05	1.23367e-05	1.23064e-05	1.25814e-05	1.17334e-05	1.08162e-05	9.60299e-06	8.12156e-06	7.54816e-06	7.07007e-06	6.98835e-06	7.52989e-06	8.59531e-06	9.39848e-06	9.74073e-06	9.2714e-06	8.7676e-06	7.97429e-06	7.29158e-06	6.98571e-06	6.69888e-06	6.66848e-06	6.9267e-06	7.66565e-06	8.0421e-06	8.15018e-06	7.97467e-06	7.70637e-06	7.7704e-06	7.57431e-06	7.44831e-06	7.5552e-06	7.38785e-06	7.36892e-06	7.45255e-06
25	6.28789e-06	6.4919e-06	6.59646e-06	6.64834e-06	6.43674e-06	6.51325e-06	6.64306e-06	7.04003e-06	7.65087e-06	8.11131e-06	9.01052e-06	1.07572e-05	1.1273e-05	1.15612e-05	1.1268e-05	1.0988e-05	1.08466e-05	1.11716e-05	1.06121e-05	9.79554e-06	8.90528e-06	7.50931e-06	6.87464e-06	6.42416e-06	6.2529e-06	6.62773e-06	7.57141e-06	8.34708e-06	8.76083e-06	8.4461e-06	8.03522e-06	7.44149e-06	6.75987e-06	6.44058e-06	6.15023e-06	6.08706e-06	6.21615e-06	6.8477e-06	7.27473e-06	7.39079e-06	7.29337e-06	7.00749e-06	7.0804e-06	6.99165e-06	6.81809e-06	6.93757e-06	6.81005e-06	6.73509e-06	6.814e-06
26	5.70098e-06	5.9124e-06	6.01328e-06	6.09207e-06	5.90924e-06	5.99804e-06	6.10628e-06	6.46059e-06	6.90405e-06	7.24871e-06	8.09852e-06	9.5901e-06	1.0041e-05	1.02803e-05	9.90907e-06	9.6993e-06	9.59796e-06	9.86987e-06	9.27168e-06	8.65537e-06	7.84314e-06	6.66891e-06	6.18203e-06	5.738e-06	5.65614e-06	6.04629e-06	6.94312e-06	7.55861e-06	7.86304e-06	7.50771e-06	7.22707e-06	6.6931e-06	6.159e-06	5.86179e-06	5.58833e-06	5.57365e-06	5.70668e-06	6.30113e-06	6.60841e-06	6.69458e-06	6.56211e-06	6.33533e-06	6.44751e-06	6.35625e-06	6.23792e-06	6.33899e-06	6.20295e-06	6.15485e-06	6.21316e-06
27	5.17342e-06	5.37979e-06	5.49161e-06	5.5679e-06	5.42533e-06	5.52118e-06	5.62148e-06	5.93116e-06	6.25241e-06	6.50647e-06	7.34752e-06	8.58118e-06	8.96486e-06	9.10461e-06	8.7094e-06	8.55858e-06	8.50584e-06	8.69669e-06	8.09629e-06	7.62213e-06	6.89149e-06	5.93185e-06	5.55459e-06	5.15484e-06	5.14304e-06	5.5592e-06	6.39275e-06	6.86425e-06	7.04556e-06	6.67614e-06	6.48374e-06	6.0206e-06	5.60472e-06	5.33373e-06	5.08759e-06	5.10818e-06	5.26673e-06	5.80441e-06	6.01359e-06	6.05116e-06	5.89225e-06	5.73804e-06	5.86912e-06	5.77553e-06	5.69899e-06	5.7688e-06	5.64128e-06	5.61835e-06	5.65721e-06
28	4.72921e-06	4.89689e-06	5.04495e-06	5.08896e-06	4.9966e-06	5.08045e-06	5.18228e-06	5.44283e-06	5.66721e-06	5.85465e-06	6.74218e-06	7.68524e-06	8.06434e-06	8.0425e-06	7.67963e-06	7.57405e-06	7.56998e-06	7.6521e-06	7.09636e-06	6.74224e-06	6.07248e-06	5.31413e-06	5.00265e-06	4.66266e-06	4.7096e-06	5.16214e-06	5.91533e-06	6.23476e-06	6.30177e-06	5.95827e-06	5.84794e-06	5.4402e-06	5.11097e-06	4.85158e-06	4.64557e-06	4.70069e-06	4.89055e-06	5.35258e-06	5.47852e-06	5.46511e-06	5.29521e-06	5.2304e-06	5.3542e-06	5.25434e-06	5.21117e-06	5.23609e-06	5.13701e-06	5.12782e-06	5.15169e-06
29	4.26744e-06	4.43285e-06	4.57546e-06	4.67829e-06	4.57194e-06	4.65516e-06	4.73309e-06	4.94715e-06	5.09262e-06	5.24686e-06	5.91986e-06	6.816e-06	7.1667e-06	7.16976e-06	6.792e-06	6.71937e-06	6.66845e-06	6.79679e-06	6.26322e-06	6.02609e-06	5.49976e-06	4.81283e-06	4.58514e-06	4.24069e-06	4.27411e-06	4.65831e-06	5.36993e-06	5.61475e-06	5.67574e-06	5.32544e-06	5.30782e-06	4.97073e-06	4.70081e-06	4.45361e-06	4.24003e-06	4.31064e-06	4.44435e-06	4.8888e-06	4.96457e-06	4.94327e-06	4.79391e-06	4.71925e-06	4.87892e-06	4.79615e-06	4.71844e-06	4.7643e-06	4.66707e-06	4.64846e-06	4.69681e-06
30	2.96236e-06	3.09168e-06	3.18233e-06	3.32396e-06	3.22176e-06	3.27986e-06	3.32055e-06	3.445e-06	3.52754e-06	3.64459e-06	3.90746e-06	4.6548e-06	4.90968e-06	5.00482e-06	4.71216e-06	4.6555e-06	4.5651e-06	4.72242e-06	4.37112e-06	4.21919e-06	3.94587e-06	3.43421e-06	3.27765e-06	3.01064e-06	2.98346e-06	3.18654e-06	3.69173e-06	3.9006e-06	3.97784e-06	3.73087e-06	3.73452e-06	3.55078e-06	3.35902e-06	3.17957e-06	3.00242e-06	3.03549e-06	3.0823e-06	3.40483e-06	3.47367e-06	3.4701e-06	3.38291e-06	3.28446e-06	3.4265e-06	3.39586e-06	3.29439e-06	3.356e-06	3.28019e-06	3.25321e-06	3.30986e-06
[truncated: 12 more columns]

## Sheet: Fig. 2B
channel	(zscore(wm-nwm)+zscore(wm+nwm))/2
'Fp1'	-0.662711
'Fp2'	-0.518355
'F3'	-0.279069
'F4'	-0.440717
'C3'	-0.160091
'C4'	0.158866
'P3'	0.447898
'P4'	0.704031
'O1'	0.507744
'O2'	0.336381
'F7'	-0.436476
'F8'	-0.236749
'T7'	-0.471994
'T8'	-0.342998
'P7'	-0.11328
'P8'	0.157096
'Fz'	-0.547418
'Cz'	0.197332
'Pz'	1.36853
'VEOG'	-0.269046
'FC1'	-0.335078
'FC2'	-0.298571
'CP1'	0.412899
'CP2'	0.957051
'FC5'	-0.221237
'FC6'	-0.181438
'CP5'	-0.313889
'CP6'	0.172552
'FT9'	-0.396457
'FT10'	-0.178145
'TP9'	-0.337776
'TP10'	-0.11993
'F1'	-0.450434
'F2'	-0.467824
'C1'	-0.174283
'C2'	0.442313
'P1'	0.724105
'P2'	1.01998
'AF3'	-0.454444
'AF4'	-0.643421
'FC3'	-0.236838
'FC4'	-0.254281
'CP3'	-0.122726
'CP4'	0.555577
'PO3'	0.504201
'PO4'	0.838065
'F5'	-0.485019
'F6'	-0.357569
'C5'	-0.260879
'C6'	-0.121918
'P5'	0.24028
'P6'	0.179259
'AF7'	-0.555554
'AF8'	-0.45451
'FT7'	-0.302164
'FT8'	-0.198891
'TP7'	-0.370319
'TP8'	0.0931369
'PO7'	0.190927
'PO8'	0.733805
'Fpz'	-0.588412
'CPz'	0.993931
'POz'	1.28195
'Oz'	0.376509
'FCz'	-0.233505

## Sheet: Fig. 2C
time frequency	0	0.01	0.02	0.03	0.04	0.05	0.06	0.07	0.08	0.09	0.1	0.11	0.12	0.13	0.14	0.15	0.16	0.17	0.18	0.19	0.2	0.21	0.22	0.23	0.24	0.25	0.26	0.27	0.28	0.29	0.3	0.31	0.32	0.33	0.34	0.35	0.36	0.37	0.38	0.39	0.4	0.41	0.42	0.43	0.44	0.45	0.46	0.47	0.48
1	8.34743e-07	1.24103e-06	1.58058e-06	1.69905e-06	1.64273e-06	1.78294e-06	1.88115e-06	1.8919e-06	2.01539e-06	2.21379e-06	2.51458e-06	2.78968e-06	2.90473e-06	2.89532e-06	3.13356e-06	3.20936e-06	3.26052e-06	3.20089e-06	3.35363e-06	3.61428e-06	3.61777e-06	3.6871e-06	3.98812e-06	4.38107e-06	4.41009e-06	4.27126e-06	4.19461e-06	4.10783e-06	3.77264e-06	3.58115e-06	3.48855e-06	3.4288e-06	3.49774e-06	3.63964e-06	3.59877e-06	3.45977e-06	3.60396e-06	3.47238e-06	3.38691e-06	3.32402e-06	3.27395e-06	3.29315e-06	3.13936e-06	3.17693e-06	3.25307e-06	3.28713e-06	3.23512e-06	3.14771e-06	3.05681e-06
2	2.88435e-07	1.21699e-06	1.93279e-06	2.67953e-06	3.20059e-06	3.92813e-06	4.46591e-06	4.82404e-06	5.14181e-06	5.35602e-06	5.61163e-06	5.79497e-06	6.18447e-06	6.54612e-06	6.85706e-06	6.91334e-06	7.01637e-06	7.06014e-06	7.25282e-06	7.75009e-06	8.22242e-06	8.66998e-06	9.01271e-06	9.41266e-06	9.3944e-06	9.10306e-06	8.76421e-06	8.74027e-06	8.31278e-06	7.90797e-06	7.57017e-06	7.21813e-06	7.15995e-06	7.1664e-06	7.44429e-06	7.71422e-06	7.93534e-06	7.87932e-06	7.85e-06	7.778e-06	7.49257e-06	7.45495e-06	7.49695e-06	7.49102e-06	7.11709e-06	6.6605e-06	6.45396e-06	6.08284e-06	5.66715e-06
3	-5.69665e-06	-4.31905e-06	-3.14469e-06	-1.67136e-06	-4.74368e-07	7.66736e-07	1.7238e-06	2.10706e-06	2.19293e-06	1.86799e-06	1.38017e-06	1.11116e-06	1.56962e-06	2.33024e-06	2.86362e-06	3.1048e-06	3.2802e-06	3.43165e-06	3.56804e-06	4.05501e-06	4.81072e-06	5.12635e-06	5.18257e-06	5.40822e-06	5.49475e-06	5.46658e-06	5.49805e-06	5.88689e-06	5.54e-06	4.95188e-06	4.4943e-06	4.23662e-06	4.03465e-06	4.01712e-06	4.72256e-06	5.49882e-06	6.22564e-06	7.08259e-06	7.52205e-06	7.69162e-06	7.28345e-06	7.17018e-06	7.34417e-06	6.9498e-06	5.7987e-06	4.6869e-06	3.93387e-06	3.22932e-06	2.86578e-06
4	-8.98994e-06	-7.59932e-06	-6.29053e-06	-4.69693e-06	-3.39926e-06	-2.24327e-06	-1.49449e-06	-1.76254e-06	-2.40901e-06	-3.38396e-06	-4.57768e-06	-5.36248e-06	-5.33706e-06	-4.58787e-06	-3.61317e-06	-3.09422e-06	-2.85445e-06	-2.78845e-06	-2.83891e-06	-3.02056e-06	-3.03721e-06	-3.43414e-06	-3.63605e-06	-3.25732e-06	-2.40355e-06	-1.20089e-06	1.38298e-07	1.15625e-06	1.50842e-06	1.30968e-06	1.23885e-06	1.67499e-06	2.02449e-06	2.59533e-06	3.49094e-06	4.23724e-06	5.25879e-06	6.73936e-06	7.52569e-06	7.56515e-06	6.99841e-06	6.55932e-06	6.12215e-06	4.82104e-06	2.45848e-06	4.78245e-07	-1.04774e-06	-1.93182e-06	-2.26087e-06
5	-4.26927e-06	-3.46921e-06	-2.78263e-06	-1.83102e-06	-7.4093e-07	3.29481e-08	-2.04509e-07	-1.40864e-06	-3.01141e-06	-4.5806e-06	-6.15788e-06	-7.28548e-06	-7.97722e-06	-8.08292e-06	-7.57215e-06	-7.32576e-06	-7.19214e-06	-7.29191e-06	-7.68963e-06	-9.01543e-06	-1.06249e-05	-1.18629e-05	-1.23926e-05	-1.20083e-05	-1.04672e-05	-8.06754e-06	-5.85424e-06	-4.38856e-06	-3.00848e-06	-2.17616e-06	-1.26673e-06	3.78286e-07	2.59998e-06	4.87686e-06	6.44936e-06	7.08342e-06	7.6343e-06	8.60907e-06	9.20776e-06	8.95104e-06	8.38682e-06	7.51215e-06	5.82091e-06	2.98855e-06	-6.11198e-07	-3.76968e-06	-6.02952e-06	-6.94876e-06	-7.5007e-06
6	1.51527e-06	1.50419e-06	1.53122e-06	1.97015e-06	3.05358e-06	3.77577e-06	2.99341e-06	1.25297e-06	-1.08988e-06	-3.28692e-06	-4.6106e-06	-4.84382e-06	-5.42618e-06	-6.68226e-06	-7.84382e-06	-8.48298e-06	-8.19904e-06	-7.74718e-06	-8.05728e-06	-1.04884e-05	-1.40074e-05	-1.63383e-05	-1.73021e-05	-1.7068e-05	-1.54736e-05	-1.31309e-05	-1.13435e-05	-9.81092e-06	-7.43937e-06	-5.19173e-06	-2.78441e-06	7.97287e-07	5.524e-06	1.01346e-05	1.33031e-05	1.44953e-05	1.43631e-05	1.42358e-05	1.43348e-05	1.4367e-05	1.42615e-05	1.27736e-05	9.50535e-06	5.09231e-06	6.56722e-07	-3.28687e-06	-5.68803e-06	-6.26875e-06	-6.60679e-06
7	3.82742e-06	3.50457e-06	3.4261e-06	3.79519e-06	4.91608e-06	6.17167e-06	6.4591e-06	5.4698e-06	3.11878e-06	3.57267e-07	-7.51294e-07	3.91733e-07	1.22162e-06	-1.511e-07	-3.28285e-06	-5.81187e-06	-5.31837e-06	-3.00831e-06	-1.83522e-06	-4.15361e-06	-9.16592e-06	-1.28345e-05	-1.38764e-05	-1.31201e-05	-1.14959e-05	-1.0327e-05	-9.67655e-06	-7.98669e-06	-4.42818e-06	-2.56999e-07	3.66016e-06	8.39544e-06	1.41058e-05	2.01686e-05	2.54241e-05	2.77793e-05	2.69887e-05	2.52113e-05	2.44486e-05	2.4803e-05	2.50758e-05	2.30831e-05	1.85736e-05	1.32116e-05	8.30334e-06	4.38817e-06	2.22675e-06	1.66573e-06	1.52746e-06
8	4.73533e-06	4.78864e-06	5.01333e-06	5.51612e-06	6.61668e-06	8.3311e-06	1.01218e-05	1.07773e-05	8.76345e-06	5.16268e-06	2.95217e-06	4.70155e-06	7.31894e-06	5.80021e-06	3.98796e-07	-4.31226e-06	-2.83388e-06	2.32763e-06	5.28922e-06	3.61054e-06	-1.72537e-06	-5.20105e-06	-4.93206e-06	-2.84782e-06	-1.0424e-06	-1.10607e-06	-9.15119e-07	1.6395e-06	6.80676e-06	1.29245e-05	1.75943e-05	2.14987e-05	2.61118e-05	3.23145e-05	3.8564e-05	4.10347e-05	3.84987e-05	3.43571e-05	3.26059e-05	3.30549e-05	3.29167e-05	3.00162e-05	2.47525e-05	1.94255e-05	1.511e-05	1.18151e-05	9.4633e-06	8.41846e-06	8.46877e-06
9	5.79857e-06	6.57498e-06	7.30052e-06	8.39287e-06	9.76683e-06	1.13484e-05	1.32667e-05	1.50362e-05	1.39591e-05	9.83678e-06	5.52895e-06	5.74831e-06	8.81804e-06	7.2108e-06	2.76466e-07	-6.40524e-06	-4.56588e-06	3.03903e-06	7.89606e-06	6.66485e-06	1.92152e-06	1.24025e-07	2.44406e-06	5.82032e-06	7.87779e-06	7.64927e-06	8.27492e-06	1.17521e-05	1.82817e-05	2.58031e-05	3.09513e-05	3.39503e-05	3.67875e-05	4.17966e-05	4.72337e-05	4.89137e-05	4.45597e-05	3.78495e-05	3.45761e-05	3.47208e-05	3.42274e-05	3.01602e-05	2.41867e-05	1.95309e-05	1.68888e-05	1.47203e-05	1.21075e-05	1.04375e-05	1.06915e-05
10	6.92343e-06	8.29358e-06	9.52737e-06	1.15247e-05	1.31277e-05	1.39206e-05	1.48551e-05	1.70344e-05	1.72736e-05	1.2749e-05	5.9888e-06	3.35372e-06	5.88498e-06	4.79045e-06	-2.77366e-06	-1.07733e-05	-9.04572e-06	-3.34331e-08	6.10821e-06	5.19112e-06	1.88423e-06	1.57821e-06	4.68981e-06	8.0901e-06	1.05045e-05	1.1182e-05	1.22905e-05	1.62963e-05	2.32289e-05	3.12484e-05	3.67582e-05	3.96406e-05	4.09853e-05	4.39371e-05	4.81188e-05	4.92538e-05	4.39546e-05	3.5381e-05	3.08379e-05	3.07021e-05	3.02239e-05	2.56415e-05	1.99035e-05	1.65387e-05	1.55885e-05	1.42597e-05	1.15891e-05	9.4751e-06	9.79486e-06
11	8.3608e-06	9.73124e-06	1.1398e-05	1.41133e-05	1.53448e-05	1.48705e-05	1.49079e-05	1.71045e-05	1.71768e-05	1.13097e-05	2.98009e-06	-2.37183e-07	2.20346e-06	-9.75429e-08	-9.02994e-06	-1.55932e-05	-1.04458e-05	-4.82444e-07	3.52264e-06	1.20088e-06	-2.42833e-08	1.48202e-06	4.05822e-06	6.31767e-06	8.95115e-06	1.03719e-05	1.21708e-05	1.71295e-05	2.42157e-05	3.12406e-05	3.59077e-05	3.83878e-05	3.8819e-05	4.04574e-05	4.36071e-05	4.32321e-05	3.59694e-05	2.68261e-05	2.35523e-05	2.43532e-05	2.31405e-05	1.79831e-05	1.39525e-05	1.29863e-05	1.31926e-05	1.1734e-05	9.11734e-06	7.38555e-06	8.31455e-06
12	8.81559e-06	1.01069e-05	1.16809e-05	1.44276e-05	1.55088e-05	1.42217e-05	1.3259e-05	1.47436e-05	1.46129e-05	9.1027e-06	8.48657e-07	-2.8788e-06	-1.08351e-06	-3.48742e-06	-1.21771e-05	-1.7528e-05	-1.07852e-05	-7.10098e-07	1.55649e-06	-1.97466e-06	-2.49949e-06	1.841e-07	1.8702e-06	2.74747e-06	5.51216e-06	7.55703e-06	9.57982e-06	1.44751e-05	2.11343e-05	2.65675e-05	3.00355e-05	3.24762e-05	3.29689e-05	3.37589e-05	3.58973e-05	3.50256e-05	2.73939e-05	1.84222e-05	1.59568e-05	1.7679e-05	1.66201e-05	1.18096e-05	9.1156e-06	9.84071e-06	1.05944e-05	9.08653e-06	6.83982e-06	5.5413e-06	6.51702e-06
13	8.12607e-06	9.28527e-06	1.02916e-05	1.26551e-05	1.37231e-05	1.20467e-05	1.0251e-05	1.08315e-05	1.13587e-05	7.9014e-06	4.74588e-07	-4.45761e-06	-3.40275e-06	-4.01269e-06	-1.09618e-05	-1.61788e-05	-1.11447e-05	-2.14355e-06	-1.53125e-07	-3.82184e-06	-4.3666e-06	-1.70346e-06	-1.11018e-06	-8.62945e-07	2.31039e-06	4.72149e-06	6.10872e-06	9.88853e-06	1.52309e-05	1.90286e-05	2.18553e-05	2.47849e-05	2.57231e-05	2.56721e-05	2.72134e-05	2.7277e-05	2.10411e-05	1.27039e-05	1.00404e-05	1.21566e-05	1.21796e-05	8.59685e-06	6.66634e-06	7.79003e-06	8.34131e-06	7.15354e-06	5.48715e-06	4.09732e-06	4.48423e-06
14	7.50727e-06	7.94902e-06	8.51984e-06	1.05852e-05	1.09815e-05	8.78683e-06	7.06706e-06	7.36314e-06	7.90905e-06	5.39226e-06	-1.001e-06	-5.33097e-06	-3.87792e-06	-4.32551e-06	-1.05702e-05	-1.37838e-05	-8.67242e-06	-1.69307e-06	-1.88129e-06	-6.04617e-06	-5.39504e-06	-2.9235e-06	-3.61955e-06	-2.92383e-06	9.93435e-07	2.92942e-06	3.64149e-06	7.04549e-06	1.088e-05	1.27225e-05	1.49796e-05	1.80295e-05	1.88987e-05	1.85883e-05	2.01586e-05	2.01002e-05	1.39208e-05	6.91649e-06	5.81169e-06	8.51692e-06	8.65228e-06	5.80369e-06	5.1779e-06	6.66454e-06	6.36413e-06	5.18782e-06	4.11835e-06	2.59771e-06	2.9224e-06
15	6.5107e-06	6.34479e-06	6.47326e-06	8.15424e-06	8.23845e-06	6.0047e-06	4.54872e-06	4.72531e-06	5.08289e-06	3.52555e-06	-1.39403e-06	-5.14221e-06	-3.77603e-06	-4.25216e-06	-9.57434e-06	-1.126e-05	-6.55781e-06	-1.65384e-06	-3.14269e-06	-7.51949e-06	-6.30659e-06	-3.83528e-06	-5.05093e-06	-4.126e-06	1.53911e-07	1.7688e-06	1.902e-06	4.78775e-06	7.42751e-06	7.83898e-06	9.40316e-06	1.2316e-05	1.32696e-05	1.30227e-05	1.44924e-05	1.4388e-05	8.6618e-06	2.84924e-06	2.77271e-06	5.65519e-06	6.10354e-06	3.93947e-06	4.01388e-06	5.70539e-06	4.88102e-06	3.59473e-06	3.02475e-06	1.44813e-06	1.48884e-06
16	5.07052e-06	4.62513e-06	4.27617e-06	5.63246e-06	5.95525e-06	4.09735e-06	2.89404e-06	2.91326e-06	3.37103e-06	3.0598e-06	-4.05623e-07	-4.30212e-06	-3.62593e-06	-3.69752e-06	-7.88221e-06	-9.10239e-06	-5.95662e-06	-2.62232e-06	-3.95668e-06	-8.19608e-06	-7.03253e-06	-4.42111e-06	-5.48489e-06	-4.61952e-06	-5.28929e-07	9.01602e-07	4.86205e-07	2.62095e-06	4.42698e-06	4.11867e-06	5.16143e-06	7.82546e-06	9.04668e-06	8.8443e-06	1.00028e-05	1.0279e-05	5.58563e-06	6.73958e-07	7.17363e-07	3.38557e-06	4.46927e-06	2.9016e-06	2.99569e-06	4.69434e-06	3.75712e-06	2.55533e-06	2.29454e-06	6.05504e-07	1.84036e-07
17	3.67143e-06	2.93784e-06	2.38173e-06	3.68503e-06	4.09917e-06	2.59712e-06	1.88443e-06	1.94841e-06	2.65181e-06	2.99427e-06	3.04533e-07	-3.56569e-06	-3.16563e-06	-3.50306e-06	-7.01384e-06	-7.41949e-06	-5.44377e-06	-3.35335e-06	-4.9295e-06	-8.72507e-06	-6.8985e-06	-4.44746e-06	-5.35391e-06	-4.13508e-06	-4.61476e-07	3.16514e-07	-4.54714e-07	1.33936e-06	2.3356e-06	1.67797e-06	2.62531e-06	4.91216e-06	6.01896e-06	5.80295e-06	6.81504e-06	7.00078e-06	2.75231e-06	-1.01266e-06	-4.35452e-07	2.0062e-06	3.18071e-06	1.86033e-06	2.21304e-06	3.83848e-06	2.70152e-06	1.81583e-06	1.62427e-06	-2.36749e-07	-6.30635e-07
18	2.43392e-06	1.62423e-06	9.49267e-07	1.9373e-06	2.61994e-06	1.71257e-06	1.34189e-06	1.50082e-06	2.30978e-06	3.14148e-06	1.41724e-06	-2.1599e-06	-2.70328e-06	-3.20262e-06	-6.02029e-06	-6.33615e-06	-5.20899e-06	-4.15158e-06	-5.34885e-06	-8.42241e-06	-6.85533e-06	-4.43097e-06	-4.79396e-06	-3.57934e-06	-5.61136e-07	4.48763e-08	-8.58644e-07	2.91976e-07	9.24348e-07	2.47151e-07	9.85145e-07	2.81431e-06	3.83114e-06	3.7264e-06	4.41154e-06	4.57222e-06	1.21837e-06	-1.84339e-06	-1.33966e-06	7.13717e-07	2.0063e-06	1.16932e-06	1.38941e-06	2.83356e-06	2.05076e-06	1.33389e-06	1.17153e-06	-5.37911e-07	-1.12761e-06
19	1.47855e-06	7.83355e-07	-8.38502e-08	3.73069e-07	1.58006e-06	1.28062e-06	1.107e-06	1.30311e-06	2.06471e-06	3.34707e-06	2.99845e-06	-3.24147e-07	-2.33785e-06	-2.56756e-06	-4.95033e-06	-5.74875e-06	-5.10544e-06	-4.89955e-06	-4.97839e-06	-7.62351e-06	-7.10595e-06	-4.33369e-06	-4.06049e-06	-3.3116e-06	-9.03007e-07	1.16732e-07	-9.6097e-07	-6.33563e-07	1.35394e-07	-5.13862e-07	-1.67767e-07	1.22967e-06	2.33096e-06	2.38847e-06	2.59806e-06	3.06259e-06	9.21622e-07	-2.11239e-06	-2.1646e-06	-6.07522e-07	1.00989e-06	8.17257e-07	4.52394e-07	1.86689e-06	1.81074e-06	1.0032e-06	1.02658e-06	-3.26041e-07	-1.49475e-06
20	5.98723e-07	-9.24753e-08	-9.37602e-07	-3.23715e-07	9.7936e-07	9.11307e-07	1.08152e-06	1.34735e-06	2.42199e-06	3.85362e-06	3.67341e-06	1.15502e-07	-1.90139e-06	-2.40556e-06	-4.72971e-06	-5.124e-06	-5.08219e-06	-5.07618e-06	-4.98222e-06	-7.25577e-06	-6.1835e-06	-3.71128e-06	-3.29608e-06	-2.41828e-06	-4.9277e-07	6.37461e-08	-1.19506e-06	-8.87629e-07	-4.39257e-07	-9.83029e-07	-5.3281e-07	5.76361e-07	1.47442e-06	1.43256e-06	1.5567e-06	1.90578e-06	-1.22731e-07	-2.55605e-06	-2.38442e-06	-1.07969e-06	4.6491e-07	2.22916e-07	-1.81833e-08	1.43759e-06	1.35201e-06	8.24425e-07	8.044e-07	-5.78222e-07	-1.56519e-06
21	-1.38037e-07	-8.46994e-07	-1.51709e-06	-6.66756e-07	5.19213e-07	5.79508e-07	1.0615e-06	1.40639e-06	2.83081e-06	4.2501e-06	3.82363e-06	2.39442e-07	-1.36583e-06	-2.31357e-06	-4.57238e-06	-4.54687e-06	-4.94157e-06	-4.95845e-06	-5.06645e-06	-6.85356e-06	-4.98289e-06	-3.04967e-06	-2.60393e-06	-1.36342e-06	1.41e-07	2.48304e-08	-1.28466e-06	-8.69631e-07	-8.54455e-07	-1.24373e-06	-5.41826e-07	3.4933e-07	9.32709e-07	7.5646e-07	9.35624e-07	9.52568e-07	-1.19759e-06	-2.91252e-06	-2.34053e-06	-1.19126e-06	5.09677e-08	-3.59266e-07	-2.47324e-07	1.13113e-06	8.80597e-07	7.42329e-07	5.83718e-07	-8.56803e-07	-1.39667e-06
22	-5.94419e-07	-1.19873e-06	-1.79813e-06	-1.11955e-06	1.49224e-07	3.77589e-07	9.82313e-07	1.33301e-06	2.84947e-06	4.28114e-06	4.21054e-06	9.36348e-07	-8.95788e-07	-1.82881e-06	-3.99969e-06	-4.1813e-06	-4.6325e-06	-4.8211e-06	-4.61138e-06	-6.11015e-06	-4.47522e-06	-2.65499e-06	-2.02858e-06	-8.19047e-07	3.60853e-07	2.06492e-07	-1.14873e-06	-9.85939e-07	-1.00477e-06	-1.30457e-06	-6.32304e-07	5.23771e-08	5.28226e-07	3.54697e-07	4.30603e-07	4.10571e-07	-1.36064e-06	-2.93301e-06	-2.43057e-06	-1.50673e-06	-3.70759e-07	-6.03347e-07	-5.78237e-07	7.33428e-07	7.25793e-07	6.92949e-07	5.61834e-07	-6.7917e-07	-1.21964e-06
23	-9.29543e-07	-1.41267e-06	-1.94097e-06	-1.31698e-06	-5.67002e-08	2.49443e-07	9.16252e-07	1.24082e-06	2.85913e-06	4.23046e-06	4.3098e-06	1.23139e-06	-5.37116e-07	-1.45704e-06	-3.51104e-06	-3.78011e-06	-4.34888e-06	-4.49253e-06	-4.12224e-06	-5.3897e-06	-3.85823e-06	-2.26433e-06	-1.51988e-06	-3.47485e-07	5.65821e-07	3.32052e-07	-1.03322e-06	-9.82839e-07	-1.08038e-06	-1.25645e-06	-6.05463e-07	-9.27779e-08	2.85693e-07	9.66505e-08	1.32902e-07	5.84163e-08	-1.49801e-06	-2.87107e-06	-2.41073e-06	-1.64044e-06	-6.12314e-07	-7.80883e-07	-7.50428e-07	4.9621e-07	6.09658e-07	7.01244e-07	5.41717e-07	-5.36632e-07	-9.93535e-07
24	-1.00038e-06	-1.48153e-06	-1.88258e-06	-1.60806e-06	-3.89254e-07	7.11036e-08	6.88556e-07	1.03251e-06	2.36203e-06	3.85208e-06	4.30012e-06	2.04081e-06	-7.90573e-08	-8.51349e-07	-2.65776e-06	-3.40995e-06	-3.76799e-06	-4.26797e-06	-3.56774e-06	-4.58483e-06	-3.66582e-06	-2.09501e-06	-1.34004e-06	-2.00271e-07	6.57814e-07	5.75906e-07	-6.2594e-07	-9.95028e-07	-9.90736e-07	-1.23782e-06	-6.49529e-07	-2.06879e-07	9.35274e-08	-1.3156e-08	-6.10989e-08	-1.04245e-07	-1.19483e-06	-2.66321e-06	-2.40661e-06	-1.83866e-06	-8.9987e-07	-8.09005e-07	-9.32965e-07	1.02522e-07	5.24357e-07	6.31761e-07	6.64538e-07	-2.25432e-07	-7.53243e-07
25	-9.87394e-07	-1.44863e-06	-1.7579e-06	-1.78031e-06	-6.30245e-07	-6.09978e-08	4.79051e-07	8.33884e-07	1.86892e-06	3.3952e-06	4.1709e-06	2.66127e-06	3.14593e-07	-3.43669e-07	-1.92359e-06	-3.07978e-06	-3.21406e-06	-3.93121e-06	-3.04786e-06	-3.84828e-06	-3.50051e-06	-1.96405e-06	-1.21466e-06	-1.55914e-07	6.72901e-07	7.49967e-07	-2.93627e-07	-9.7908e-07	-8.74022e-07	-1.16507e-06	-6.80392e-07	-2.93206e-07	-4.86606e-08	-7.50144e-08	-1.69521e-07	-1.60152e-07	-8.5186e-07	-2.40761e-06	-2.36329e-06	-1.94731e-06	-1.10315e-06	-7.76465e-07	-1.02212e-06	-1.93163e-07	4.79012e-07	5.95586e-07	7.84461e-07	7.94693e-08	-5.31441e-07
26	-1.10531e-06	-1.43039e-06	-1.7115e-06	-1.61665e-06	-5.41884e-07	-8.3462e-08	4.65492e-07	7.12276e-07	1.9042e-06	3.17167e-06	3.8458e-06	2.24842e-06	3.78413e-07	-2.55492e-07	-1.73828e-06	-2.73343e-06	-2.9684e-06	-3.40369e-06	-2.59879e-06	-3.37678e-06	-2.8232e-06	-1.61101e-06	-8.8709e-07	1.33125e-07	7.81287e-07	7.02683e-07	-3.55954e-07	-8.58389e-07	-8.74944e-07	-1.01294e-06	-5.23351e-07	-2.67124e-07	-9.76258e-08	-1.82832e-07	-1.89883e-07	-2.58714e-07	-9.77068e-07	-2.31903e-06	-2.14639e-06	-1.76825e-06	-1.03546e-06	-8.04742e-07	-9.39627e-07	-1.28518e-07	4.32605e-07	6.71594e-07	7.52512e-07	1.10441e-07	-3.45158e-07
27	-1.14974e-06	-1.37484e-06	-1.62968e-06	-1.41128e-06	-4.29154e-07	-7.49975e-08	4.36791e-07	6.29366e-07	1.90712e-06	2.95589e-06	3.44458e-06	1.79747e-06	3.53802e-07	-2.2663e-07	-1.59697e-06	-2.41442e-06	-2.7377e-06	-2.86944e-06	-2.20994e-06	-2.91861e-06	-2.24839e-06	-1.29288e-06	-5.88454e-07	3.4385e-07	8.1727e-07	6.17773e-07	-4.19801e-07	-7.62143e-07	-8.45107e-07	-8.43377e-07	-3.84919e-07	-2.37235e-07	-1.25903e-07	-2.42759e-07	-1.97547e-07	-3.31061e-07	-1.10381e-06	-2.18514e-06	-1.94626e-06	-1.54887e-06	-9.17906e-07	-7.92859e-07	-8.25267e-07	-4.17283e-08	4.30044e-07	7.35128e-07	7.00059e-07	1.38661e-07	-1.74639e-07
28	-1.15379e-06	-1.27227e-06	-1.52953e-06	-1.17208e-06	-3.1619e-07	-5.40159e-08	4.13808e-07	5.6734e-07	1.93218e-06	2.70042e-06	3.01712e-06	1.35045e-06	3.48815e-07	-2.64727e-07	-1.51444e-06	-2.13861e-06	-2.5568e-06	-2.25879e-06	-1.94809e-06	-2.48866e-06	-1.75358e-06	-1.04337e-06	-3.1299e-07	4.82069e-07	7.86277e-07	4.97424e-07	-5.18623e-07	-6.6232e-07	-8.17463e-07	-6.38276e-07	-2.79708e-07	-2.2368e-07	-1.45714e-07	-2.88247e-07	-1.7662e-07	-3.86467e-07	-1.22255e-06	-1.99069e-06	-1.77748e-06	-1.28077e-06	-8.08373e-07	-7.61385e-07	-6.5969e-07	5.16943e-08	4.41656e-07	8.14574e-07	6.13264e-07	1.89016e-07	-2.72269e-08
29	-1.06853e-06	-1.12477e-06	-1.38231e-06	-1.12944e-06	-2.97494e-07	-8.35371e-08	3.32012e-07	3.85734e-07	1.68867e-06	2.28846e-06	2.74159e-06	1.28484e-06	3.57615e-07	-1.20403e-07	-1.19306e-06	-1.90588e-06	-2.20629e-06	-1.97907e-06	-1.55842e-06	-2.12855e-06	-1.52424e-06	-9.00362e-07	-2.64536e-07	4.53962e-07	7.53611e-07	5.11861e-07	-4.54851e-07	-6.09533e-07	-7.40867e-07	-5.47928e-07	-2.15509e-07	-2.03279e-07	-1.53705e-07	-3.09715e-07	-1.63438e-07	-3.71855e-07	-1.02624e-06	-1.86361e-06	-1.60354e-06	-1.16058e-06	-7.59312e-07	-6.57619e-07	-6.12326e-07	1.48357e-08	4.1018e-07	7.79663e-07	6.51467e-07	3.06345e-07	3.97799e-08
30	-6.99373e-07	-7.62608e-07	-9.29829e-07	-9.10867e-07	-2.87742e-07	-9.05264e-08	1.53339e-07	1.81702e-07	9.61353e-07	1.46101e-06	1.9392e-06	1.1603e-06	2.91363e-07	6.66698e-08	-5.90231e-07	-1.31104e-06	-1.38801e-06	-1.49945e-06	-9.33989e-07	-1.39584e-06	-1.16815e-06	-6.59694e-07	-2.80094e-07	2.40609e-07	5.39081e-07	4.39442e-07	-1.83683e-07	-4.62794e-07	-4.81863e-07	-4.19686e-07	-1.59366e-07	-1.36464e-07	-1.25542e-07	-2.1416e-07	-1.35035e-07	-2.34774e-07	-5.33984e-07	-1.32458e-06	-1.12442e-06	-8.99429e-07	-5.74591e-07	-4.13284e-07	-4.84467e-07	-9.03911e-08	2.74637e-07	5.0293e-07	5.68181e-07	3.17807e-07	5.55823e-08
[truncated: 12 more columns]

## Sheet: Fig. 2D
time	wm_alpha power	wm_alpha power_SEM	nwm_alpha_power	nwm_alpha power_SEM
0	5.84098e-05	9.50583e-06	5.19553e-05	5.13213e-06
10	5.90958e-05	9.54409e-06	5.17486e-05	4.92851e-06
20	6.02971e-05	9.72552e-06	5.19873e-05	4.75606e-06
30	6.24825e-05	9.88536e-06	5.25958e-05	4.72966e-06
40	6.54889e-05	1.00416e-05	5.42749e-05	5.11125e-06
50	7.00732e-05	1.04424e-05	5.79556e-05	6.05728e-06
60	7.68071e-05	1.12606e-05	6.35192e-05	7.25983e-06
70	8.48424e-05	1.26073e-05	6.98543e-05	8.50417e-06
80	9.23936e-05	1.3802e-05	7.81004e-05	1.0733e-05
90	9.94211e-05	1.45014e-05	8.96565e-05	1.42756e-05
100	0.000106974	1.53024e-05	0.000102612	1.78313e-05
110	0.000114705	1.68105e-05	0.000111313	1.94608e-05
120	0.000121812	1.89405e-05	0.000115756	1.94146e-05
130	0.00012444	2.02812e-05	0.000120014	1.94669e-05
140	0.000122127	1.98945e-05	0.00012491	1.97276e-05
150	0.000118059	1.85806e-05	0.00012733	1.90429e-05
160	0.000116412	1.82605e-05	0.000123135	1.63416e-05
170	0.000116169	1.8675e-05	0.000114956	1.29941e-05
180	0.000112652	1.79298e-05	0.000106948	1.08526e-05
190	0.000105333	1.56059e-05	0.000101166	9.99382e-06
200	9.83557e-05	1.31139e-05	9.78417e-05	9.48309e-06
210	9.58031e-05	1.2134e-05	9.63073e-05	9.33771e-06
220	9.68968e-05	1.2984e-05	9.53318e-05	9.93095e-06
230	9.76473e-05	1.47405e-05	9.33022e-05	1.06946e-05
240	9.7206e-05	1.59128e-05	9.06333e-05	1.10426e-05
250	9.66147e-05	1.56251e-05	8.95905e-05	1.16391e-05
260	9.80313e-05	1.52045e-05	9.0076e-05	1.2814e-05
270	0.000101774	1.59551e-05	9.00699e-05	1.41253e-05
280	0.000105712	1.7084e-05	8.75788e-05	1.43073e-05
290	0.000108596	1.76566e-05	8.32915e-05	1.33743e-05
300	0.000109719	1.79073e-05	7.94158e-05	1.21736e-05
310	0.00010978	1.86175e-05	7.64106e-05	1.1452e-05
320	0.000109672	1.95301e-05	7.3996e-05	1.10314e-05
330	0.000110857	2.0794e-05	7.12305e-05	1.04915e-05
340	0.000113242	2.25895e-05	6.88607e-05	1.00129e-05
350	0.000114067	2.39614e-05	6.84588e-05	9.97481e-06
360	0.000111132	2.36245e-05	7.03864e-05	1.05177e-05
370	0.000105544	2.20322e-05	7.19402e-05	1.12109e-05
380	0.00010098	2.08293e-05	7.0587e-05	1.16117e-05
390	9.8445e-05	1.99193e-05	6.77372e-05	1.19322e-05
400	9.66677e-05	1.90074e-05	6.65406e-05	1.28328e-05
410	9.3818e-05	1.81311e-05	6.78677e-05	1.43457e-05
420	8.95337e-05	1.77638e-05	6.88349e-05	1.53106e-05
430	8.44884e-05	1.74939e-05	6.73681e-05	1.50582e-05
440	7.99712e-05	1.65317e-05	6.47762e-05	1.42555e-05
450	7.67619e-05	1.52974e-05	6.36296e-05	1.43514e-05
460	7.51758e-05	1.48034e-05	6.46065e-05	1.56787e-05
470	7.50179e-05	1.53668e-05	6.60888e-05	1.70803e-05
480	7.49611e-05	1.61303e-05	6.56437e-05	1.70555e-05
490	7.43484e-05	1.6148e-05	6.37886e-05	1.5976e-05
500	7.38167e-05	1.56035e-05	6.28911e-05	1.53489e-05
510	7.47374e-05	1.55763e-05	6.39388e-05	1.59367e-05
520	7.72575e-05	1.65081e-05	6.50945e-05	1.66755e-05
530	7.90456e-05	1.72727e-05	6.44706e-05	1.61102e-05
540	7.87352e-05	1.70749e-05	6.2725e-05	1.41585e-05
550	7.80477e-05	1.62878e-05	6.18711e-05	1.23142e-05
560	7.82124e-05	1.58156e-05	6.25605e-05	1.15875e-05
570	7.8065e-05	1.57496e-05	6.30952e-05	1.12609e-05
580	7.60248e-05	1.52036e-05	6.27085e-05	1.06036e-05
590	7.3095e-05	1.40709e-05	6.22831e-05	9.87565e-06
600	7.12589e-05	1.31348e-05	6.30562e-05	9.49646e-06
