# Supplementary material for: Fast-backward replay of sequentially memorized items in humans
Source: eLife. 2018 Oct 18;7:e35164. doi: 10.7554/eLife.35164 (PMC6231774; doi:10.7554/eLife.35164)
Supplement: Figure 3—source data 1. [file elife-35164-fig3-data1.xlsx]

## Sheet: Fig. 3B
time frequency	0	0.01	0.02	0.03	0.04	0.05	0.06	0.07	0.08	0.09	0.1	0.11	0.12	0.13	0.14	0.15	0.16	0.17	0.18	0.19	0.2	0.21	0.22	0.23	0.24	0.25	0.26	0.27	0.28	0.29	0.3	0.31	0.32	0.33	0.34	0.35	0.36	0.37	0.38	0.39	0.4	0.41	0.42	0.43	0.44	0.45	0.46	0.47	0.48
1	1.91023e-07	1.73963e-07	-2.77038e-07	-2.97297e-07	-2.40152e-07	-4.34076e-07	-2.28797e-07	1.76941e-07	-1.41832e-07	-2.25815e-07	9.49367e-08	5.22517e-07	7.07463e-07	2.68496e-08	-5.03052e-07	-1.09206e-06	-1.31044e-06	-1.42504e-06	-1.11596e-06	-9.04273e-07	-2.49762e-07	-6.61526e-08	3.67797e-07	3.57664e-07	2.10926e-07	9.3917e-07	1.00323e-06	9.96562e-07	1.68633e-06	2.20557e-06	2.25907e-06	2.72197e-06	3.51913e-06	4.14027e-06	4.68902e-06	4.33445e-06	5.04192e-06	4.95283e-06	4.51597e-06	4.85879e-06	5.73131e-06	6.30688e-06	7.41895e-06	7.89765e-06	8.04433e-06	8.65077e-06	9.21388e-06	1.03038e-05	1.05255e-05
2	2.10887e-06	2.03e-06	1.11112e-06	1.351e-06	1.35151e-06	1.48817e-06	1.84313e-06	2.37168e-06	2.10578e-06	1.56071e-06	1.51134e-06	1.36407e-06	1.07341e-06	-5.21441e-07	-1.42035e-06	-2.4162e-06	-3.70113e-06	-4.59109e-06	-4.23419e-06	-4.50513e-06	-4.22376e-06	-4.0073e-06	-3.57823e-06	-2.66523e-06	-2.86216e-06	-9.56907e-07	1.86427e-07	1.03479e-06	2.78166e-06	4.8171e-06	6.05766e-06	7.67659e-06	9.88576e-06	1.13144e-05	1.3135e-05	1.3185e-05	1.48816e-05	1.58811e-05	1.65283e-05	1.80939e-05	2.02804e-05	2.20436e-05	2.41718e-05	2.56971e-05	2.6661e-05	2.89294e-05	2.92788e-05	3.12882e-05	3.2292e-05
3	1.05895e-05	1.071e-05	1.06209e-05	1.18213e-05	1.32859e-05	1.49927e-05	1.5803e-05	1.60296e-05	1.5878e-05	1.50531e-05	1.45622e-05	1.33569e-05	1.23223e-05	1.08101e-05	9.52191e-06	8.56538e-06	6.4737e-06	4.07323e-06	2.89892e-06	1.40678e-06	4.41904e-07	-7.89306e-07	-1.61864e-06	-1.31478e-06	-1.81502e-06	-1.38495e-07	1.39732e-06	2.5955e-06	4.22036e-06	5.75447e-06	7.11192e-06	9.46545e-06	1.16892e-05	1.34401e-05	1.58243e-05	1.6633e-05	1.82694e-05	2.07049e-05	2.3531e-05	2.61372e-05	2.87946e-05	3.1902e-05	3.51049e-05	3.6741e-05	3.84155e-05	4.10908e-05	4.08924e-05	4.18754e-05	4.28332e-05
4	1.71971e-05	1.80762e-05	2.00789e-05	2.30252e-05	2.73126e-05	3.08596e-05	3.30865e-05	3.42279e-05	3.43839e-05	3.40687e-05	3.36911e-05	3.22613e-05	3.06745e-05	2.95807e-05	2.85644e-05	2.81243e-05	2.58873e-05	2.25826e-05	1.94199e-05	1.60731e-05	1.31849e-05	9.63275e-06	6.42745e-06	4.07832e-06	2.58261e-06	2.29526e-06	2.37639e-06	1.57805e-06	1.28178e-06	7.3321e-07	-5.60557e-08	2.93772e-07	1.36789e-07	4.13943e-07	9.17673e-07	7.76226e-07	1.20347e-06	3.56808e-06	5.78039e-06	7.85016e-06	9.96336e-06	1.2861e-05	1.66807e-05	1.87921e-05	2.09658e-05	2.28373e-05	2.30898e-05	2.33566e-05	2.39878e-05
5	1.7645e-05	1.97309e-05	2.3632e-05	2.83416e-05	3.41523e-05	3.8997e-05	4.29e-05	4.49781e-05	4.53329e-05	4.49563e-05	4.4108e-05	4.23925e-05	4.0221e-05	3.84455e-05	3.6862e-05	3.57726e-05	3.30969e-05	2.93973e-05	2.51807e-05	2.11162e-05	1.7571e-05	1.39661e-05	1.07654e-05	8.71809e-06	8.24157e-06	7.69657e-06	7.00764e-06	5.35977e-06	3.96705e-06	1.77235e-06	-1.17799e-06	-4.51305e-06	-7.69214e-06	-1.02323e-05	-1.21665e-05	-1.42985e-05	-1.60699e-05	-1.59179e-05	-1.61182e-05	-1.548e-05	-1.43405e-05	-1.14922e-05	-7.61271e-06	-4.23755e-06	-9.7463e-07	1.56733e-06	3.05514e-06	3.83765e-06	5.25565e-06
6	1.8207e-05	2.19704e-05	2.75281e-05	3.33448e-05	3.89612e-05	4.38852e-05	4.77501e-05	4.92313e-05	4.93325e-05	4.83364e-05	4.61625e-05	4.30539e-05	3.97152e-05	3.64171e-05	3.29944e-05	2.99106e-05	2.60358e-05	2.17291e-05	1.7386e-05	1.425e-05	1.21158e-05	1.10575e-05	1.09676e-05	1.24933e-05	1.50709e-05	1.66929e-05	1.71474e-05	1.66885e-05	1.5143e-05	1.18091e-05	7.41836e-06	1.3014e-06	-5.15825e-06	-1.11279e-05	-1.52075e-05	-1.85823e-05	-2.16626e-05	-2.35963e-05	-2.49533e-05	-2.49377e-05	-2.31532e-05	-1.82335e-05	-1.30311e-05	-8.17356e-06	-3.19977e-06	1.17874e-06	3.98904e-06	6.09945e-06	8.32507e-06
7	1.93829e-05	2.44324e-05	3.08112e-05	3.68927e-05	4.20109e-05	4.60553e-05	4.89896e-05	4.99899e-05	5.014e-05	4.90624e-05	4.64199e-05	4.26255e-05	3.86183e-05	3.45637e-05	3.05946e-05	2.70533e-05	2.30471e-05	1.88666e-05	1.51375e-05	1.31245e-05	1.28198e-05	1.39448e-05	1.60162e-05	1.95237e-05	2.394e-05	2.78528e-05	2.98708e-05	2.98473e-05	2.76643e-05	2.39106e-05	1.89951e-05	1.15903e-05	2.1687e-06	-7.23652e-06	-1.40781e-05	-1.81573e-05	-2.08463e-05	-2.3356e-05	-2.55289e-05	-2.59796e-05	-2.28842e-05	-1.5914e-05	-8.21141e-06	-1.76699e-06	3.94105e-06	9.52645e-06	1.45375e-05	1.91431e-05	2.18943e-05
8	1.88056e-05	2.43063e-05	3.02735e-05	3.61565e-05	4.07445e-05	4.38235e-05	4.6067e-05	4.71059e-05	4.73798e-05	4.63798e-05	4.44551e-05	4.13564e-05	3.80309e-05	3.47954e-05	3.21977e-05	3.0375e-05	2.79095e-05	2.47539e-05	2.17949e-05	2.06336e-05	2.18532e-05	2.36625e-05	2.53305e-05	2.80787e-05	3.25913e-05	3.80692e-05	4.07832e-05	3.97209e-05	3.66012e-05	3.32424e-05	2.93607e-05	2.20246e-05	1.11432e-05	-3.31122e-07	-8.76678e-06	-1.26689e-05	-1.45022e-05	-1.71819e-05	-2.07096e-05	-2.22727e-05	-1.87712e-05	-1.10071e-05	-1.70892e-06	5.16423e-06	9.99094e-06	1.60363e-05	2.37251e-05	3.08961e-05	3.38791e-05
9	1.58032e-05	2.14374e-05	2.69281e-05	3.25908e-05	3.69146e-05	3.94285e-05	4.11347e-05	4.20132e-05	4.22304e-05	4.11179e-05	3.9729e-05	3.74435e-05	3.52014e-05	3.31598e-05	3.18931e-05	3.16261e-05	3.08276e-05	2.89445e-05	2.65397e-05	2.56383e-05	2.75723e-05	2.99268e-05	3.11162e-05	3.22033e-05	3.56182e-05	4.16278e-05	4.50789e-05	4.31585e-05	3.89843e-05	3.58914e-05	3.38034e-05	2.80844e-05	1.75929e-05	5.96939e-06	-2.23757e-06	-5.39695e-06	-6.64307e-06	-9.44994e-06	-1.38808e-05	-1.67523e-05	-1.40655e-05	-6.72374e-06	2.45379e-06	8.97961e-06	1.27942e-05	1.84136e-05	2.70466e-05	3.59164e-05	3.94652e-05
10	1.14099e-05	1.69205e-05	2.23753e-05	2.80691e-05	3.24415e-05	3.45918e-05	3.61175e-05	3.69238e-05	3.69919e-05	3.56378e-05	3.42107e-05	3.24725e-05	3.08312e-05	2.92342e-05	2.81299e-05	2.81175e-05	2.81956e-05	2.71917e-05	2.49979e-05	2.37972e-05	2.58861e-05	2.92229e-05	3.07211e-05	3.04051e-05	3.27121e-05	3.889e-05	4.34542e-05	4.12167e-05	3.64929e-05	3.40511e-05	3.36346e-05	2.97219e-05	2.06703e-05	1.03897e-05	3.15217e-06	2.20229e-07	-9.60562e-07	-3.70662e-06	-8.25804e-06	-1.20956e-05	-1.11522e-05	-5.25276e-06	2.73101e-06	8.93486e-06	1.22097e-05	1.67676e-05	2.48263e-05	3.426e-05	3.86911e-05
11	8.69484e-06	1.38932e-05	1.95106e-05	2.52564e-05	2.88646e-05	3.00895e-05	3.12854e-05	3.20407e-05	3.13739e-05	2.94329e-05	2.79228e-05	2.65699e-05	2.50939e-05	2.35447e-05	2.22131e-05	2.17584e-05	2.16715e-05	2.05493e-05	1.82685e-05	1.73755e-05	2.04063e-05	2.4518e-05	2.57553e-05	2.45982e-05	2.74097e-05	3.45042e-05	3.85423e-05	3.45641e-05	3.02219e-05	2.99348e-05	3.03562e-05	2.59266e-05	1.76782e-05	9.84114e-06	4.68661e-06	2.42603e-06	1.15413e-06	-1.75482e-06	-6.12064e-06	-9.54874e-06	-8.6546e-06	-3.67914e-06	2.72594e-06	7.63315e-06	1.02917e-05	1.44011e-05	2.22498e-05	3.0903e-05	3.38129e-05
12	6.5976e-06	1.14695e-05	1.69135e-05	2.24157e-05	2.52951e-05	2.55812e-05	2.60347e-05	2.65423e-05	2.54371e-05	2.29733e-05	2.13964e-05	2.05233e-05	1.92912e-05	1.79565e-05	1.66231e-05	1.54813e-05	1.45714e-05	1.32131e-05	1.09747e-05	1.02458e-05	1.34292e-05	1.77008e-05	1.92364e-05	1.79777e-05	2.05032e-05	2.77392e-05	3.18398e-05	2.76368e-05	2.34354e-05	2.43513e-05	2.53898e-05	2.05903e-05	1.32293e-05	7.67656e-06	4.13365e-06	2.40484e-06	1.24206e-06	-1.27098e-06	-4.87183e-06	-7.51045e-06	-6.55389e-06	-2.72286e-06	1.91841e-06	5.44389e-06	7.63961e-06	1.11686e-05	1.78321e-05	2.5351e-05	2.74555e-05
13	4.83314e-06	9.23635e-06	1.40049e-05	1.88066e-05	2.11088e-05	2.05999e-05	2.01298e-05	2.04946e-05	1.93388e-05	1.68242e-05	1.57504e-05	1.55611e-05	1.48394e-05	1.40376e-05	1.27582e-05	1.0819e-05	9.22031e-06	7.92531e-06	5.87248e-06	4.85733e-06	7.08887e-06	1.09878e-05	1.31172e-05	1.20464e-05	1.31686e-05	1.98471e-05	2.50888e-05	2.20685e-05	1.7813e-05	1.89813e-05	2.02336e-05	1.62901e-05	1.06429e-05	6.4989e-06	3.43293e-06	1.7335e-06	9.30896e-07	-5.76227e-07	-3.17348e-06	-5.45233e-06	-5.31808e-06	-3.09362e-06	-7.98199e-08	2.74214e-06	4.66851e-06	6.88115e-06	1.1719e-05	1.85086e-05	2.15081e-05
14	5.24685e-06	8.98204e-06	1.29659e-05	1.64306e-05	1.72687e-05	1.56093e-05	1.43125e-05	1.45469e-05	1.29293e-05	1.06402e-05	1.10131e-05	1.15838e-05	1.14754e-05	1.15872e-05	1.03063e-05	7.7527e-06	5.88626e-06	4.42821e-06	2.5183e-06	1.79614e-06	3.77504e-06	6.93606e-06	8.31836e-06	7.12006e-06	8.10648e-06	1.48799e-05	1.96896e-05	1.59667e-05	1.25524e-05	1.48955e-05	1.51335e-05	1.11335e-05	7.32836e-06	4.34521e-06	1.84918e-06	6.71311e-07	3.52462e-07	-5.06161e-07	-2.4531e-06	-4.1859e-06	-4.02051e-06	-2.56677e-06	-7.79473e-07	1.39501e-06	2.84267e-06	3.97957e-06	8.11173e-06	1.41525e-05	1.64864e-05
15	5.90183e-06	8.96844e-06	1.20502e-05	1.41842e-05	1.38371e-05	1.13583e-05	9.25612e-06	9.13539e-06	7.52913e-06	5.55634e-06	7.22138e-06	8.68324e-06	9.186e-06	1.02552e-05	9.26447e-06	6.46955e-06	4.36815e-06	2.73805e-06	9.61259e-07	5.524e-07	2.22798e-06	4.43024e-06	4.99678e-06	3.66185e-06	4.4867e-06	1.06702e-05	1.5139e-05	1.12976e-05	8.34514e-06	1.1163e-05	1.09673e-05	7.02619e-06	4.6836e-06	2.63579e-06	5.12187e-07	-1.50424e-07	-8.88158e-08	-4.93541e-07	-1.88178e-06	-3.2835e-06	-3.04787e-06	-1.96945e-06	-9.27078e-07	6.50912e-07	1.72592e-06	2.11512e-06	5.28449e-06	1.05404e-05	1.24557e-05
16	6.09707e-06	8.46025e-06	1.05839e-05	1.1674e-05	1.06914e-05	7.89548e-06	5.04365e-06	4.73801e-06	3.60525e-06	2.05609e-06	4.69032e-06	6.89351e-06	7.89392e-06	9.5873e-06	8.92682e-06	6.15412e-06	3.95012e-06	2.28929e-06	7.11028e-07	4.09534e-07	1.54527e-06	2.83303e-06	2.87795e-06	1.57569e-06	1.7784e-06	6.80621e-06	1.14717e-05	8.32374e-06	5.20829e-06	7.89145e-06	7.82486e-06	4.53138e-06	3.29756e-06	1.72142e-06	-1.67954e-07	-4.68268e-07	-2.3104e-07	-2.90151e-07	-1.29377e-06	-2.61485e-06	-2.49745e-06	-1.6522e-06	-9.635e-07	1.63009e-07	1.04356e-06	7.22251e-07	2.7002e-06	7.29917e-06	9.4365e-06
17	6.44234e-06	8.03144e-06	9.35926e-06	9.43563e-06	7.85969e-06	4.82548e-06	1.63891e-06	1.55334e-06	6.50437e-07	-1.58148e-07	3.48088e-06	5.92084e-06	7.2876e-06	9.16344e-06	8.36428e-06	5.75362e-06	3.78837e-06	2.18767e-06	9.27224e-07	8.64938e-07	1.74857e-06	2.29183e-06	1.60425e-06	3.12207e-07	3.37057e-07	4.69967e-06	8.86721e-06	5.63688e-06	2.89575e-06	5.68956e-06	5.14567e-06	2.64047e-06	2.37485e-06	8.97281e-07	-5.73439e-07	-4.79921e-07	-2.24843e-07	-1.79394e-07	-1.13655e-06	-2.3156e-06	-2.06258e-06	-1.20298e-06	-6.36305e-07	2.75894e-07	8.4443e-07	-9.85472e-08	1.36826e-06	5.41111e-06	7.2448e-06
18	6.19292e-06	7.42726e-06	8.1699e-06	7.74228e-06	5.92078e-06	3.00253e-06	-2.27615e-07	-6.71831e-07	-1.09544e-06	-1.45293e-06	2.19087e-06	5.04535e-06	6.66241e-06	8.53894e-06	7.93045e-06	5.67015e-06	3.90953e-06	2.48354e-06	1.44998e-06	1.4819e-06	2.1715e-06	2.34626e-06	1.29901e-06	-8.24322e-08	-3.00473e-07	2.91543e-06	6.54005e-06	4.2585e-06	1.68448e-06	3.73947e-06	3.38984e-06	1.52869e-06	1.7187e-06	6.38399e-07	-5.75565e-07	-3.77441e-07	-1.21921e-07	-7.17547e-08	-9.03847e-07	-2.00364e-06	-1.84136e-06	-9.53923e-07	-2.90263e-07	5.18604e-07	9.50491e-07	-1.76721e-07	5.02478e-07	3.73523e-06	5.52548e-06
19	5.44398e-06	6.66804e-06	7.08449e-06	6.69688e-06	4.88556e-06	2.46487e-06	-8.22302e-07	-2.08762e-06	-1.73941e-06	-2.33205e-06	6.65711e-07	4.15852e-06	5.78457e-06	7.7585e-06	7.74853e-06	5.8635e-06	4.2414e-06	3.01563e-06	2.05557e-06	2.00976e-06	2.59684e-06	2.75262e-06	1.68125e-06	1.39219e-07	-5.58941e-07	1.09846e-06	4.64641e-06	4.17833e-06	1.10948e-06	2.10595e-06	2.59635e-06	9.29544e-07	1.29049e-06	9.19079e-07	-3.27044e-07	-2.49166e-07	1.74787e-08	5.88231e-08	-4.94644e-07	-1.64992e-06	-1.79568e-06	-9.29598e-07	-3.21883e-08	6.55425e-07	1.27161e-06	2.43074e-07	-2.29382e-07	2.09858e-06	4.18573e-06
20	5.10602e-06	5.92213e-06	6.15093e-06	5.42861e-06	3.54231e-06	1.3875e-06	-1.79129e-06	-2.5725e-06	-2.11435e-06	-2.47624e-06	8.60217e-07	3.92999e-06	5.53488e-06	7.22662e-06	6.9604e-06	5.3285e-06	4.10861e-06	3.09448e-06	2.38942e-06	2.5301e-06	3.08469e-06	3.00334e-06	1.64885e-06	1.34127e-07	-6.03571e-07	7.60663e-07	3.94593e-06	3.33433e-06	5.59873e-07	1.54506e-06	1.61111e-06	4.50785e-07	1.1959e-06	8.26665e-07	-1.55328e-07	-9.37577e-09	1.26947e-07	5.89153e-08	-5.34471e-07	-1.63406e-06	-1.59745e-06	-6.75702e-07	3.21278e-07	9.47624e-07	1.42629e-06	1.87459e-07	-3.58521e-07	1.68162e-06	3.44565e-06
21	4.72247e-06	5.18364e-06	5.33771e-06	4.24235e-06	2.3218e-06	2.8557e-07	-2.512e-06	-2.57872e-06	-2.24693e-06	-2.19192e-06	1.42347e-06	3.86828e-06	5.4757e-06	6.72223e-06	5.94483e-06	4.51525e-06	3.76055e-06	2.99776e-06	2.6047e-06	2.93855e-06	3.47435e-06	3.19059e-06	1.61477e-06	1.63103e-07	-4.3115e-07	1.01138e-06	3.57462e-06	2.42615e-06	3.45542e-07	1.40426e-06	6.93885e-07	8.21714e-08	1.1247e-06	6.14631e-07	2.86534e-08	2.96391e-07	2.4441e-07	3.8765e-08	-6.93894e-07	-1.65552e-06	-1.34496e-06	-4.24364e-07	6.04482e-07	1.22576e-06	1.48609e-06	4.42935e-08	-1.42668e-07	1.71746e-06	2.98985e-06
22	3.97315e-06	4.4641e-06	4.65376e-06	3.60449e-06	1.77443e-06	6.2552e-08	-2.3622e-06	-2.45471e-06	-1.95671e-06	-2.03104e-06	1.14011e-06	3.54867e-06	5.06561e-06	6.06162e-06	5.29217e-06	4.05633e-06	3.60737e-06	3.07492e-06	2.81063e-06	3.12953e-06	3.67385e-06	3.48218e-06	1.95927e-06	4.74528e-07	-2.08536e-07	7.7225e-07	3.0598e-06	2.47104e-06	4.67383e-07	1.10273e-06	3.68518e-07	-1.26423e-07	9.73632e-07	7.24726e-07	2.88613e-07	5.46208e-07	3.82844e-07	8.80011e-08	-5.66348e-07	-1.47905e-06	-1.19898e-06	-4.02696e-07	7.13873e-07	1.2967e-06	1.61224e-06	2.46032e-07	-5.72765e-08	1.41303e-06	2.53946e-06
23	3.28843e-06	3.76875e-06	4.04034e-06	3.01423e-06	1.29469e-06	-1.18141e-07	-2.18478e-06	-2.09318e-06	-1.58032e-06	-1.74547e-06	1.08247e-06	3.2957e-06	4.7655e-06	5.44465e-06	4.62089e-06	3.552e-06	3.37356e-06	3.02792e-06	2.88218e-06	3.21332e-06	3.75795e-06	3.61856e-06	2.12696e-06	6.84853e-07	-3.37512e-08	7.12158e-07	2.79352e-06	2.49997e-06	6.33208e-07	9.72206e-07	1.0454e-07	-2.21309e-07	8.78443e-07	7.53283e-07	4.91841e-07	7.59601e-07	5.05029e-07	1.17767e-07	-4.74826e-07	-1.3104e-06	-1.01805e-06	-3.44384e-07	7.99577e-07	1.34217e-06	1.65655e-06	3.38867e-07	6.39507e-08	1.31206e-06	2.23741e-06
24	2.27451e-06	3.05391e-06	3.45452e-06	2.77286e-06	1.25465e-06	-5.26454e-08	-1.61287e-06	-1.89e-06	-1.13557e-06	-1.45631e-06	4.61258e-07	2.7801e-06	4.17609e-06	4.99047e-06	4.19336e-06	3.19499e-06	3.04592e-06	2.92631e-06	2.87217e-06	3.07846e-06	3.65491e-06	3.72098e-06	2.59757e-06	1.06775e-06	2.49585e-07	4.91431e-07	2.2547e-06	2.71305e-06	1.13428e-06	9.39781e-07	1.97602e-07	-3.71422e-07	6.01915e-07	7.84794e-07	6.04126e-07	9.44827e-07	7.01197e-07	3.09549e-07	-2.72211e-07	-9.889e-07	-9.16962e-07	-4.15007e-07	6.46607e-07	1.24299e-06	1.73028e-06	6.34497e-07	1.84816e-07	1.03768e-06	2.02267e-06
25	1.35976e-06	2.42721e-06	2.94389e-06	2.58077e-06	1.28745e-06	1.07069e-07	-1.01715e-06	-1.62035e-06	-7.52918e-07	-1.21903e-06	-9.3238e-08	2.30172e-06	3.61223e-06	4.51709e-06	3.8266e-06	2.90511e-06	2.75695e-06	2.79148e-06	2.78025e-06	2.87013e-06	3.4693e-06	3.73216e-06	2.92384e-06	1.33853e-06	4.26101e-07	2.94462e-07	1.84341e-06	2.92209e-06	1.55839e-06	9.00824e-07	3.13402e-07	-4.46494e-07	3.65523e-07	8.14078e-07	7.07863e-07	1.07533e-06	8.53597e-07	4.78562e-07	-5.61878e-08	-6.79984e-07	-8.01989e-07	-4.69096e-07	4.95336e-07	1.14902e-06	1.74403e-06	8.75237e-07	3.02316e-07	8.23062e-07	1.79178e-06
26	9.92046e-07	1.88706e-06	2.54123e-06	2.03906e-06	8.94932e-07	-2.52089e-08	-9.30742e-07	-1.09021e-06	-4.44221e-07	-9.82514e-07	1.60567e-07	2.22965e-06	3.47996e-06	3.99977e-06	3.20882e-06	2.39772e-06	2.504e-06	2.52617e-06	2.60277e-06	2.72363e-06	3.3224e-06	3.5578e-06	2.64518e-06	1.19281e-06	3.551e-07	3.84269e-07	1.94246e-06	2.85092e-06	1.52063e-06	9.20664e-07	4.45065e-08	-4.11737e-07	3.99271e-07	7.06936e-07	7.86684e-07	1.2206e-06	8.69086e-07	4.65868e-07	-5.52191e-09	-5.79234e-07	-5.46389e-07	-3.56741e-07	6.25643e-07	1.17924e-06	1.7111e-06	6.97593e-07	4.30617e-07	9.88225e-07	1.67018e-06
27	7.08182e-07	1.46505e-06	2.13482e-06	1.5785e-06	5.42141e-07	-9.90016e-08	-8.00682e-07	-6.33859e-07	-2.15441e-07	-7.83965e-07	3.88576e-07	2.18262e-06	3.33412e-06	3.46552e-06	2.65083e-06	1.97984e-06	2.2359e-06	2.27146e-06	2.36692e-06	2.56528e-06	3.1432e-06	3.2917e-06	2.27665e-06	9.84491e-07	2.67385e-07	5.02821e-07	2.04925e-06	2.74395e-06	1.42583e-06	8.26106e-07	-1.42363e-07	-3.53983e-07	4.05932e-07	6.31768e-07	8.5206e-07	1.2882e-06	8.82762e-07	4.22143e-07	4.54519e-08	-4.56434e-07	-3.50393e-07	-2.15934e-07	7.44144e-07	1.23295e-06	1.59538e-06	5.74594e-07	5.34732e-07	1.13458e-06	1.51944e-06
28	4.94148e-07	1.1433e-06	1.79818e-06	1.18882e-06	2.36346e-07	-5.52179e-08	-6.39687e-07	-1.91966e-07	-1.22962e-07	-6.49504e-07	6.03779e-07	2.13456e-06	3.18812e-06	2.84903e-06	2.19328e-06	1.65833e-06	2.02322e-06	2.03734e-06	2.09256e-06	2.42429e-06	2.92536e-06	2.98017e-06	1.83825e-06	7.56861e-07	1.43764e-07	6.4356e-07	2.17281e-06	2.61513e-06	1.2615e-06	6.46063e-07	-3.01975e-07	-2.45674e-07	4.07341e-07	5.87199e-07	9.40471e-07	1.30534e-06	8.65147e-07	3.24782e-07	1.39567e-07	-3.49966e-07	-1.83055e-07	-7.50485e-08	8.50741e-07	1.29831e-06	1.40231e-06	4.81614e-07	6.39793e-07	1.27596e-06	1.27486e-06
29	8.53678e-08	6.92654e-07	1.57154e-06	9.24495e-07	1.62399e-07	1.29561e-08	-4.42329e-07	2.53358e-08	8.10053e-08	-5.80943e-07	4.0241e-07	1.89804e-06	2.847e-06	2.50147e-06	1.89692e-06	1.36222e-06	1.81956e-06	1.72309e-06	1.84757e-06	2.12698e-06	2.60489e-06	2.72704e-06	1.68768e-06	6.82745e-07	6.31149e-08	4.47114e-07	1.99315e-06	2.62526e-06	1.25676e-06	6.8065e-07	-3.53231e-07	-2.74003e-07	3.76777e-07	4.50864e-07	8.71169e-07	1.40556e-06	8.33229e-07	3.74915e-07	2.57546e-07	-2.26649e-07	-2.43681e-08	-7.18199e-08	8.26744e-07	1.18173e-06	1.46354e-06	3.98939e-07	6.26176e-07	1.26033e-06	1.2595e-06
30	-2.77745e-07	2.57979e-07	1.03813e-06	6.40156e-07	2.17111e-07	2.64185e-08	-1.66355e-07	9.73155e-10	2.07465e-07	-3.75729e-07	-1.59192e-08	1.18365e-06	1.84331e-06	1.83762e-06	1.333e-06	9.22818e-07	1.22161e-06	1.12148e-06	1.27703e-06	1.36927e-06	1.75158e-06	1.93048e-06	1.34996e-06	5.59076e-07	5.68949e-08	1.09543e-07	1.22709e-06	1.98851e-06	1.08871e-06	5.8944e-07	-1.94481e-07	-2.71149e-07	2.10357e-07	2.4036e-07	5.55531e-07	1.09452e-06	6.31143e-07	3.93674e-07	2.33864e-07	-5.52961e-08	2.54759e-08	-9.16418e-08	5.07039e-07	7.64165e-07	1.19169e-06	3.19439e-07	4.12984e-07	8.42671e-07	1.018e-06
[truncated: 12 more columns]

## Sheet: Fig. 3C
time	wm1_alpha power	wm2_alpha power	nwm_alpha power
0	0.000162447	0.000164743	0.000155338
10	0.000165491	0.000167139	0.000152597
20	0.000165644	0.000170498	0.00014872
30	0.000164835	0.000174606	0.000144623
40	0.000166202	0.00017839	0.000142976
50	0.000170029	0.000181417	0.000144161
60	0.00017477	0.000184535	0.000146422
70	0.000176418	0.000189841	0.00014903
80	0.000176	0.000196108	0.000151981
90	0.000176564	0.000202354	0.000156738
100	0.000180363	0.000207429	0.000162738
110	0.000185313	0.000210986	0.00016911
120	0.000189303	0.000213972	0.000174769
130	0.000191438	0.000215664	0.000178789
140	0.000192659	0.000218241	0.000182262
150	0.000195653	0.000222927	0.000186742
160	0.000200157	0.000226241	0.000191469
170	0.0002027	0.000224324	0.000193573
180	0.000201345	0.000218256	0.000192322
190	0.000199322	0.000214121	0.000190281
200	0.000202012	0.000214287	0.000189641
210	0.000208096	0.000215358	0.000190315
220	0.000211647	0.00021438	0.000190203
230	0.000210994	0.000212151	0.000188172
240	0.000212197	0.000209929	0.000184401
250	0.000218981	0.000208412	0.000180845
260	0.000226695	0.000206785	0.000180197
270	0.000228168	0.000205667	0.000182673
280	0.000224734	0.000204808	0.000184617
290	0.000222539	0.000202896	0.000184858
300	0.000223193	0.000199257	0.000184857
310	0.000221481	0.000194034	0.000186739
320	0.000214011	0.000189653	0.000190482
330	0.000202727	0.000187979	0.000194307
340	0.000192599	0.000189094	0.000197059
350	0.0001879	0.000191004	0.000198727
360	0.000186782	0.000190489	0.000199294
370	0.000185447	0.000187859	0.000200097
380	0.000181482	0.00018554	0.000201174
390	0.000176951	0.000185788	0.000201958
400	0.00017523	0.000188342	0.000200368
410	0.000176253	0.000192002	0.000196214
420	0.000177757	0.000194893	0.000190195
430	0.000176807	0.000195331	0.000183812
440	0.000173587	0.00019347	0.000177628
450	0.000171194	0.000191861	0.000170544
460	0.00017191	0.00019281	0.000163319
470	0.000174	0.000194756	0.000156805
480	0.000173421	0.000195348	0.000153343
490	0.000169601	0.000192853	0.000152887
500	0.000166543	0.000190417	0.000154215
510	0.000167006	0.000191154	0.000155166
520	0.000169135	0.000193781	0.000155234
530	0.000169157	0.000194357	0.000156513
540	0.000167016	0.000192665	0.000160181
550	0.000166379	0.000191164	0.000165126
560	0.000169528	0.000190946	0.000169286
570	0.000174537	0.00018934	0.00017089
580	0.000178766	0.00018479	0.000170619
590	0.0001809	0.000178882	0.000169896
600	0.000182552	0.000175038	0.000169588

## Sheet: Fig. 3D
time	wm1_alpha power_normalized	wm1_alpha power_normalized_SEM	wm2_alpha power_normalized	wm2_alpha power_normalized_SEM
0	1.60474e-06	1.13588e-05	3.90018e-06	9.44193e-06
10	3.74871e-06	1.23033e-05	5.39685e-06	9.84835e-06
20	4.02339e-06	1.20505e-05	8.87719e-06	1.03539e-05
30	3.4806e-06	1.1313e-05	1.32509e-05	1.11068e-05
40	3.67948e-06	1.09929e-05	1.58674e-05	1.17182e-05
50	4.82661e-06	1.10709e-05	1.62149e-05	1.16479e-05
60	6.19417e-06	1.07795e-05	1.59593e-05	1.10848e-05
70	4.65483e-06	9.72664e-06	1.80784e-05	1.08493e-05
80	1.30388e-06	8.55005e-06	2.14115e-05	1.13379e-05
90	-1.98798e-06	8.14244e-06	2.38021e-05	1.22763e-05
100	-3.1465e-06	8.71055e-06	2.39188e-05	1.2945e-05
110	-3.15625e-06	9.71911e-06	2.2516e-05	1.30392e-05
120	-3.37855e-06	1.08625e-05	2.12908e-05	1.27949e-05
130	-3.85895e-06	1.1679e-05	2.03673e-05	1.24318e-05
140	-5.06196e-06	1.21732e-05	2.05202e-05	1.26381e-05
150	-6.1206e-06	1.29861e-05	2.11527e-05	1.35725e-05
160	-5.79898e-06	1.42717e-05	2.02857e-05	1.44774e-05
170	-4.16556e-06	1.50015e-05	1.74581e-05	1.45543e-05
180	-2.62921e-06	1.46258e-05	1.4282e-05	1.3914e-05
190	-1.9196e-06	1.36595e-05	1.28797e-05	1.3333e-05
200	3.23241e-08	1.27363e-05	1.23067e-05	1.30526e-05
210	3.50621e-06	1.18853e-05	1.07682e-05	1.2302e-05
220	6.23686e-06	1.0943e-05	8.96966e-06	1.13076e-05
230	7.22155e-06	9.7807e-06	8.37866e-06	1.05606e-05
240	1.00212e-05	8.77141e-06	7.75334e-06	1.00817e-05
250	1.6235e-05	8.47716e-06	5.66622e-06	1.00244e-05
260	2.21363e-05	8.88724e-06	2.22615e-06	1.02423e-05
270	2.26656e-05	9.12809e-06	1.63805e-07	1.01783e-05
280	2.00144e-05	8.71465e-06	8.83232e-08	9.73459e-06
290	1.91079e-05	8.54859e-06	-5.35325e-07	9.4514e-06
300	2.07572e-05	9.49779e-06	-3.17875e-06	9.66536e-06
310	2.07298e-05	1.07122e-05	-6.71751e-06	9.77916e-06
320	1.59622e-05	1.11718e-05	-8.3955e-06	9.3544e-06
330	7.72306e-06	1.07575e-05	-7.02554e-06	9.03769e-06
340	-3.18682e-07	1.05647e-05	-3.82292e-06	9.7412e-06
350	-4.64405e-06	1.1424e-05	-1.53989e-06	1.10187e-05
360	-5.4063e-06	1.26388e-05	-1.69965e-06	1.10634e-05
370	-5.6875e-06	1.27453e-05	-3.27539e-06	9.91783e-06
380	-7.91676e-06	1.18007e-05	-3.85876e-06	8.75865e-06
390	-1.12815e-05	1.11819e-05	-2.44402e-06	8.31763e-06
400	-1.27501e-05	1.15093e-05	3.62133e-07	8.15756e-06
410	-1.19035e-05	1.23928e-05	3.84572e-06	7.77541e-06
420	-9.85835e-06	1.29836e-05	7.27798e-06	7.40685e-06
430	-8.50959e-06	1.30473e-05	1.00142e-05	6.89779e-06
440	-7.97478e-06	1.31624e-05	1.19085e-05	6.2424e-06
450	-6.67239e-06	1.34503e-05	1.39948e-05	5.96699e-06
460	-4.10326e-06	1.3786e-05	1.67972e-05	6.42911e-06
470	-1.18677e-06	1.36506e-05	1.95687e-05	7.28739e-06
480	-6.16709e-07	1.32016e-05	2.13108e-05	8.08516e-06
490	-2.17941e-06	1.24896e-05	2.10727e-05	8.43422e-06
500	-3.84891e-06	1.13717e-05	2.00254e-05	8.62498e-06
510	-4.1024e-06	1.02348e-05	2.00453e-05	9.18272e-06
520	-3.58191e-06	9.13203e-06	2.10643e-05	9.73476e-06
530	-4.18515e-06	8.354e-06	2.10147e-05	9.8897e-06
540	-6.27106e-06	8.14441e-06	1.93774e-05	9.59221e-06
550	-7.84409e-06	8.42421e-06	1.69412e-05	9.24838e-06
560	-7.0584e-06	8.77908e-06	1.43589e-05	8.91326e-06
570	-3.71837e-06	9.29921e-06	1.10844e-05	8.36049e-06
580	7.07551e-07	1.0093e-05	6.73182e-06	7.7395e-06
590	4.34069e-06	1.12692e-05	2.32277e-06	7.62439e-06
600	6.82619e-06	1.27323e-05	-6.88041e-07	8.25229e-06

## Sheet: Fig. 3E Top
time	corss-item correlation coefficient	p<0.05 threshold (corrected)
-400	-0.00917	0.58929
-390	-0.0208	0.58929
-380	-0.03778	0.58929
-370	-0.06157	0.58929
-360	-0.08735	0.58929
-350	-0.10847	0.58929
-340	-0.12198	0.58929
-330	-0.13155	0.58929
-320	-0.13673	0.58929
-310	-0.13069	0.58929
-300	-0.1061	0.58929
-290	-0.06259	0.58929
-280	-0.0067	0.58929
-270	0.05605	0.58929
-260	0.12253	0.58929
-250	0.19352	0.58929
-240	0.27277	0.58929
-230	0.35777	0.58929
-220	0.43731	0.58929
-210	0.49995	0.58929
-200	0.54751	0.58929
-190	0.58974	0.58929
-180	0.62709	0.58929
-170	0.6485	0.58929
-160	0.64818	0.58929
-150	0.63155	0.58929
-140	0.60773	0.58929
-130	0.57785	0.58929
-120	0.53892	0.58929
-110	0.49301	0.58929
-100	0.4454	0.58929
-90	0.39989	0.58929
-80	0.35463	0.58929
-70	0.30383	0.58929
-60	0.24542	0.58929
-50	0.18614	0.58929
-40	0.13642	0.58929
-30	0.09561	0.58929
-20	0.0515	0.58929
-10	-0.00254	0.58929
0	-0.05701	0.58929
10	-0.08809	0.58929
20	-0.09672	0.58929
30	-0.0992	0.58929
40	-0.10647	0.58929
50	-0.11274	0.58929
60	-0.10529	0.58929
70	-0.08054	0.58929
80	-0.04747	0.58929
90	-0.01804	0.58929
100	0.00304	0.58929
110	0.02017	0.58929
120	0.03926	0.58929
130	0.05992	0.58929
140	0.0765	0.58929
150	0.08552	0.58929
160	0.08917	0.58929
170	0.08967	0.58929
180	0.08574	0.58929
190	0.07633	0.58929
200	0.06466	0.58929
210	0.05445	0.58929
220	0.04437	0.58929
230	0.02999	0.58929
240	0.01118	0.58929
250	-0.00642	0.58929
260	-0.01691	0.58929
270	-0.01999	0.58929
280	-0.02042	0.58929
290	-0.02227	0.58929
300	-0.02527	0.58929
310	-0.02578	0.58929
320	-0.02165	0.58929
330	-0.01509	0.58929
340	-0.00994	0.58929
350	-0.00787	0.58929
360	-0.00695	0.58929
370	-0.00522	0.58929
380	-0.00256	0.58929
390	-0.000472738	0.58929
400	0.000107126	0.58929

## Sheet: Fig. 3E bottom
time	within item correlation coefficient
0	1
10	0.98666
20	0.95265
30	0.9068
40	0.8539
50	0.79315
60	0.72269
70	0.64359
80	0.55914
90	0.47344
100	0.39002
110	0.31122
120	0.23769
130	0.16918
140	0.10659
150	0.05226
160	0.00893
170	-0.02164
180	-0.03997
190	-0.04897
200	-0.05199
210	-0.05005
220	-0.0413
230	-0.02359
240	0.00311
250	0.03683
260	0.0747
270	0.11443
280	0.15482
290	0.19607
300	0.23875
310	0.28179
320	0.32201
330	0.35636
340	0.38437
350	0.4079
360	0.42839
370	0.44504
380	0.45569
390	0.45859
400	0.4535
410	0.44123
420	0.42274
430	0.39887
440	0.37029
450	0.33775
460	0.30227
470	0.26515
480	0.22764
490	0.19071
500	0.15563
510	0.1238
520	0.09561
530	0.07054
540	0.04845
550	0.03008
560	0.01647
570	0.00768
580	0.00275
590	0.000450607
600	-0.000226189
