# Supplementary material for: Fast-backward replay of sequentially memorized items in humans
Source: eLife. 2018 Oct 18;7:e35164. doi: 10.7554/eLife.35164 (PMC6231774; doi:10.7554/eLife.35164)
Supplement: Figure 4—source data 1. [file elife-35164-fig4-data1.xlsx]

## Sheet: Fig. 4A
	all subjects	all subjects_SEM	high group	high group_SEM	low group	low group_SEM
behavior accuracy	0.88802	0.0288	0.90712	0.0179	0.79601	0.0527

## Sheet: Fig. 4B
time	wm_alpha power	wm_alpha power_CI	nwm_alpha power	nwm_alpha power_CI
0	7.29458e-05	1.12329e-05	5.26831e-05	4.90943e-06
10	7.39013e-05	1.15898e-05	5.39482e-05	5.25985e-06
20	7.44641e-05	1.20836e-05	5.4387e-05	5.27751e-06
30	7.46119e-05	1.24414e-05	5.46642e-05	5.3612e-06
40	7.4683e-05	1.27253e-05	5.65808e-05	6.02714e-06
50	7.57391e-05	1.31743e-05	6.15216e-05	7.23719e-06
60	7.82686e-05	1.39262e-05	6.88705e-05	8.36177e-06
70	8.35935e-05	1.54093e-05	7.72817e-05	9.50026e-06
80	9.13757e-05	1.69828e-05	8.90097e-05	1.23891e-05
90	9.93099e-05	1.78985e-05	0.000104552	1.6987e-05
100	0.000105206	1.85877e-05	0.000119939	2.11993e-05
110	0.00011006	2.01453e-05	0.000128547	2.28853e-05
120	0.000117991	2.31341e-05	0.000133031	2.28143e-05
130	0.000126099	2.55467e-05	0.000139078	2.3123e-05
140	0.000129844	2.53478e-05	0.000145014	2.32686e-05
150	0.000127342	2.32446e-05	0.000145505	2.17509e-05
160	0.00012421	2.2267e-05	0.000137714	1.75909e-05
170	0.000123187	2.28048e-05	0.000128811	1.2737e-05
180	0.000120607	2.24343e-05	0.000122893	9.57215e-06
190	0.000113455	1.96808e-05	0.000117936	7.77221e-06
200	0.000104168	1.59615e-05	0.000112897	6.82411e-06
210	9.78342e-05	1.34771e-05	0.000109821	8.06242e-06
220	9.49788e-05	1.27663e-05	0.000109723	1.08866e-05
230	9.26019e-05	1.2698e-05	0.000109121	1.30141e-05
240	9.07132e-05	1.2025e-05	0.00010621	1.40352e-05
250	9.1298e-05	1.10708e-05	0.000104177	1.5215e-05
260	9.54571e-05	1.14391e-05	0.000104318	1.72444e-05
270	0.000101693	1.3172e-05	0.000104967	1.93093e-05
280	0.000108248	1.50754e-05	0.000102608	1.95816e-05
290	0.000115997	1.71622e-05	9.82788e-05	1.81062e-05
300	0.000123854	1.96876e-05	9.42987e-05	1.62025e-05
310	0.000130036	2.21603e-05	9.1556e-05	1.50348e-05
320	0.000134661	2.38899e-05	8.95811e-05	1.43351e-05
330	0.000140617	2.56901e-05	8.69548e-05	1.3431e-05
340	0.000148296	2.82255e-05	8.49014e-05	1.26101e-05
350	0.000152991	3.01805e-05	8.53811e-05	1.23995e-05
360	0.000151285	2.95909e-05	8.94052e-05	1.28693e-05
370	0.00014541	2.71367e-05	9.34249e-05	1.3581e-05
380	0.00014133	2.51812e-05	9.34727e-05	1.40707e-05
390	0.000138986	2.36806e-05	9.09125e-05	1.46234e-05
400	0.000135878	2.23577e-05	8.98863e-05	1.60302e-05
410	0.000130893	2.12613e-05	9.19257e-05	1.82364e-05
420	0.000125291	2.10204e-05	9.36026e-05	1.96174e-05
430	0.000119225	2.09296e-05	9.19631e-05	1.92937e-05
440	0.000112852	1.97363e-05	8.8493e-05	1.8224e-05
450	0.000107235	1.79947e-05	8.71934e-05	1.84089e-05
460	0.000104269	1.72126e-05	8.9359e-05	2.02932e-05
470	0.000104951	1.79756e-05	9.23651e-05	2.22663e-05
480	0.000106287	1.91445e-05	9.22296e-05	2.22272e-05
490	0.000105347	1.93652e-05	8.95861e-05	2.06648e-05
500	0.000103114	1.86442e-05	8.86489e-05	1.95991e-05
510	0.0001036	1.83454e-05	9.13125e-05	2.01875e-05
520	0.000108164	1.9338e-05	9.42211e-05	2.10951e-05
530	0.000111957	2.02414e-05	9.32555e-05	2.03216e-05
540	0.000111389	1.99518e-05	8.88704e-05	1.76409e-05
550	0.000108635	1.87545e-05	8.5054e-05	1.50461e-05
560	0.000106781	1.78177e-05	8.39075e-05	1.40212e-05
570	0.000104897	1.76634e-05	8.26924e-05	1.35871e-05
580	0.00010096	1.7226e-05	7.96097e-05	1.23898e-05
590	9.62099e-05	1.60117e-05	7.61671e-05	1.06113e-05
600	9.28842e-05	1.48594e-05	7.55534e-05	9.44676e-06

## Sheet: Fig. 4C
time	wm_alpha power	wm_alpha power_CI	nwm_alpha power	nwm_alpha power_CI
0	4.38739e-05	5.73315e-06	5.12276e-05	5.43942e-06
10	4.42902e-05	5.02597e-06	4.95491e-05	4.61799e-06
20	4.61302e-05	4.78821e-06	4.95876e-05	4.19772e-06
30	5.03531e-05	5.19449e-06	5.05274e-05	4.04933e-06
40	5.62948e-05	5.8057e-06	5.19689e-05	4.04378e-06
50	6.44073e-05	6.71764e-06	5.43895e-05	4.58e-06
60	7.53455e-05	8.03646e-06	5.81679e-05	5.8486e-06
70	8.60913e-05	9.31386e-06	6.24269e-05	7.1217e-06
80	9.34115e-05	1.00117e-05	6.71911e-05	8.20516e-06
90	9.95322e-05	1.04313e-05	7.47609e-05	1.00356e-05
100	0.000108742	1.14897e-05	8.52841e-05	1.27844e-05
110	0.00011935	1.29733e-05	9.408e-05	1.46127e-05
120	0.000125633	1.39713e-05	9.84814e-05	1.45924e-05
130	0.000122781	1.36563e-05	0.00010095	1.39679e-05
140	0.000114411	1.25735e-05	0.000104805	1.42934e-05
150	0.000108777	1.24066e-05	0.000109156	1.50772e-05
160	0.000108613	1.33187e-05	0.000108555	1.44931e-05
170	0.000109151	1.36303e-05	0.000101102	1.2622e-05
180	0.000104697	1.20496e-05	9.10024e-05	1.08729e-05
190	9.72113e-05	1.00888e-05	8.43972e-05	1.04722e-05
200	9.25432e-05	9.59937e-06	8.27867e-05	1.04763e-05
210	9.3772e-05	1.08789e-05	8.27935e-05	9.5405e-06
220	9.88148e-05	1.34401e-05	8.09407e-05	7.60895e-06
230	0.000102693	1.67077e-05	7.74836e-05	5.83217e-06
240	0.000103699	1.91602e-05	7.50568e-05	4.76899e-06
250	0.000101931	1.92952e-05	7.50038e-05	4.40841e-06
260	0.000100605	1.84431e-05	7.58338e-05	3.65868e-06
270	0.000101856	1.86018e-05	7.51728e-05	2.7758e-06
280	0.000103176	1.91732e-05	7.25496e-05	2.68455e-06
290	0.000101195	1.83065e-05	6.83042e-05	3.20166e-06
300	9.55839e-05	1.55839e-05	6.45329e-05	3.6519e-06
310	8.95244e-05	1.29246e-05	6.12653e-05	3.75108e-06
320	8.46828e-05	1.15212e-05	5.84109e-05	3.70115e-06
330	8.10963e-05	1.07764e-05	5.55062e-05	3.81675e-06
340	7.81868e-05	9.85957e-06	5.282e-05	3.83486e-06
350	7.5144e-05	8.88863e-06	5.15365e-05	3.86411e-06
360	7.09788e-05	8.35819e-06	5.13676e-05	4.08883e-06
370	6.56773e-05	7.96648e-06	5.04556e-05	4.07989e-06
380	6.063e-05	7.47592e-06	4.77012e-05	3.78321e-06
390	5.79037e-05	7.18921e-06	4.45619e-05	3.50033e-06
400	5.74576e-05	7.27239e-06	4.31948e-05	3.69992e-06
410	5.67433e-05	7.33807e-06	4.38097e-05	4.23752e-06
420	5.37767e-05	6.97462e-06	4.40673e-05	4.46298e-06
430	4.97515e-05	6.45469e-06	4.2773e-05	4.23015e-06
440	4.70903e-05	6.20026e-06	4.10594e-05	3.88573e-06
450	4.62884e-05	6.50313e-06	4.00658e-05	3.84603e-06
460	4.60826e-05	7.02465e-06	3.9854e-05	4.03963e-06
470	4.50848e-05	7.15815e-06	3.98124e-05	4.08868e-06
480	4.36356e-05	6.83246e-06	3.90578e-05	3.84228e-06
490	4.33493e-05	6.4649e-06	3.79911e-05	3.73711e-06
500	4.45197e-05	6.79976e-06	3.71333e-05	4.12624e-06
510	4.58751e-05	7.65472e-06	3.65651e-05	4.56533e-06
520	4.63511e-05	8.21801e-06	3.59679e-05	4.54491e-06
530	4.61347e-05	8.31492e-06	3.56857e-05	4.15234e-06
540	4.6081e-05	8.30277e-06	3.65795e-05	3.98104e-06
550	4.74602e-05	8.79626e-06	3.86882e-05	4.30912e-06
560	4.96442e-05	9.74877e-06	4.12134e-05	4.76675e-06
570	5.12329e-05	1.03829e-05	4.3498e-05	5.29949e-06
580	5.10894e-05	1.00182e-05	4.58074e-05	6.45488e-06
590	4.99801e-05	9.14082e-06	4.83992e-05	7.95617e-06
600	4.96336e-05	8.66875e-06	5.05589e-05	8.72116e-06

## Sheet: Fig. 4D
	high group	high group_CI	low group	low group_CI
alpha power difference	5.97065e-05	2.13056e-05	2.18795e-05	1.07132e-05

## Sheet: Fig. 4E
	all subjects	all subjects_SEM	high group	high group_SEM	low group	low group_SEM
recency effect	0.04715	0.01982	0.11574	0.02028	-0.02083	0.01701

## Sheet: Fig. 4F
time	wm1_alpha power	wm1_alpha power_CI	wm2_alpha power	wm2_alpha power_CI
0	3.0004e-07	1.42899e-05	1.03423e-05	1.17555e-05
10	6.37706e-06	1.58884e-05	9.66774e-06	1.28002e-05
20	9.81542e-06	1.57955e-05	1.20959e-05	1.35873e-05
30	9.22411e-06	1.47073e-05	1.72651e-05	1.44215e-05
40	8.07431e-06	1.4115e-05	2.12821e-05	1.51658e-05
50	9.85361e-06	1.41377e-05	2.17659e-05	1.52877e-05
60	1.43992e-05	1.37168e-05	2.0781e-05	1.46357e-05
70	1.4658e-05	1.25262e-05	2.33411e-05	1.40012e-05
80	9.218e-06	1.13067e-05	2.91751e-05	1.41415e-05
90	2.4926e-06	1.08776e-05	3.426e-05	1.47734e-05
100	-2.85647e-08	1.16435e-05	3.53488e-05	1.54646e-05
110	-5.70498e-08	1.31755e-05	3.43651e-05	1.59743e-05
120	-9.63897e-07	1.46811e-05	3.35777e-05	1.63417e-05
130	-4.9311e-06	1.52842e-05	3.20851e-05	1.64377e-05
140	-1.16113e-05	1.53513e-05	3.02668e-05	1.69858e-05
150	-1.8271e-05	1.6021e-05	2.95147e-05	1.85073e-05
160	-2.24792e-05	1.71383e-05	3.02166e-05	1.99366e-05
170	-2.23088e-05	1.74292e-05	2.9648e-05	1.97561e-05
180	-1.80709e-05	1.65901e-05	2.56279e-05	1.82697e-05
190	-1.30989e-05	1.54303e-05	2.01116e-05	1.6629e-05
200	-7.74144e-06	1.43964e-05	1.52731e-05	1.52047e-05
210	-2.66047e-06	1.3165e-05	1.29579e-05	1.35618e-05
220	1.06959e-06	1.18227e-05	1.33909e-05	1.22184e-05
230	3.67316e-06	1.03516e-05	1.47102e-05	1.15892e-05
240	8.79156e-06	9.1616e-06	1.32648e-05	1.12475e-05
250	1.71672e-05	9.24508e-06	8.81244e-06	1.11348e-05
260	2.42847e-05	1.0056e-05	4.65715e-06	1.13909e-05
270	2.48765e-05	1.00525e-05	4.68574e-06	1.13134e-05
280	2.18696e-05	9.28331e-06	7.18205e-06	1.12672e-05
290	2.06178e-05	9.4062e-06	7.33713e-06	1.17118e-05
300	2.09625e-05	1.13756e-05	3.67647e-06	1.25481e-05
310	1.83822e-05	1.31402e-05	-6.44034e-07	1.28646e-05
320	1.11366e-05	1.35183e-05	-1.37048e-06	1.23249e-05
330	1.90956e-06	1.27323e-05	2.29427e-06	1.19541e-05
340	-7.26084e-06	1.23398e-05	7.9237e-06	1.27717e-05
350	-1.32264e-05	1.38042e-05	1.05482e-05	1.44259e-05
360	-1.49205e-05	1.56877e-05	8.10807e-06	1.45324e-05
370	-1.45377e-05	1.60041e-05	3.53674e-06	1.29261e-05
380	-1.57501e-05	1.4917e-05	1.35166e-06	1.11034e-05
390	-1.91998e-05	1.38734e-05	2.02828e-06	1.03791e-05
400	-2.06808e-05	1.40455e-05	2.95127e-06	1.02893e-05
410	-1.86196e-05	1.51293e-05	3.37428e-06	1.00947e-05
420	-1.69641e-05	1.56e-05	5.07746e-06	9.54008e-06
430	-1.88398e-05	1.49615e-05	8.38546e-06	8.31921e-06
440	-2.11886e-05	1.45244e-05	1.1138e-05	7.12833e-06
450	-2.00182e-05	1.48545e-05	1.31645e-05	6.67684e-06
460	-1.73427e-05	1.51472e-05	1.69859e-05	7.24922e-06
470	-1.74226e-05	1.41492e-05	2.24415e-05	8.23179e-06
480	-2.1122e-05	1.23581e-05	2.67682e-05	8.71806e-06
490	-2.32646e-05	1.10721e-05	2.72884e-05	8.58691e-06
500	-2.09134e-05	1.0676e-05	2.61936e-05	8.4693e-06
510	-1.67453e-05	1.05841e-05	2.80297e-05	9.00838e-06
520	-1.42759e-05	1.00257e-05	3.09801e-05	9.61625e-06
530	-1.54655e-05	9.67776e-06	3.16243e-05	9.95889e-06
540	-1.70123e-05	1.0032e-05	2.98851e-05	1.01394e-05
550	-1.59612e-05	1.06633e-05	2.80046e-05	1.05162e-05
560	-1.09573e-05	1.07818e-05	2.57295e-05	1.07999e-05
570	-3.17344e-06	1.08183e-05	2.00781e-05	1.07175e-05
580	4.74129e-06	1.14923e-05	1.08358e-05	1.02455e-05
590	1.07738e-05	1.30964e-05	1.78067e-06	1.01161e-05
600	1.62268e-05	1.49856e-05	-4.28917e-06	1.06049e-05

## Sheet: Fig. 4G
time	wm1_alpha power	wm1_alpha power_CI	wm2_alpha power	wm2_alpha power_CI
0	9.51495e-06	7.916e-06	-4.2187e-06	7.56235e-06
10	7.90802e-06	8.15407e-06	-2.62126e-07	7.30247e-06
20	4.83114e-06	7.49297e-06	4.74545e-06	7.60351e-06
30	4.12966e-06	7.17895e-06	8.85125e-06	8.43735e-06
40	5.48536e-06	7.36733e-06	1.03563e-05	8.92304e-06
50	5.62947e-06	7.73135e-06	1.06845e-05	8.48906e-06
60	3.23384e-06	7.5804e-06	1.14403e-05	7.96201e-06
70	-8.23606e-07	6.32619e-06	1.37398e-05	8.31857e-06
80	-2.60828e-06	5.05705e-06	1.50669e-05	9.27946e-06
90	-2.80767e-06	4.94149e-06	1.5095e-05	1.06175e-05
100	-3.20345e-06	5.64334e-06	1.44483e-05	1.13036e-05
110	-4.13189e-06	6.22872e-06	1.318e-05	1.07497e-05
120	-4.47695e-06	7.22806e-06	1.23696e-05	9.29522e-06
130	-1.64102e-06	8.7429e-06	1.29549e-05	7.7952e-06
140	3.04328e-06	9.72202e-06	1.59221e-05	7.38299e-06
150	8.35598e-06	1.01794e-05	1.84942e-05	7.44731e-06
160	1.40145e-05	1.11937e-05	1.61832e-05	7.43828e-06
170	1.75203e-05	1.24407e-05	1.08578e-05	8.02814e-06
180	1.62749e-05	1.3056e-05	8.51022e-06	9.01653e-06
190	1.25525e-05	1.27105e-05	1.18165e-05	1.02562e-05
200	1.15213e-05	1.1989e-05	1.62442e-05	1.14111e-05
210	1.42837e-05	1.13205e-05	1.5297e-05	1.1635e-05
220	1.63406e-05	1.06053e-05	9.94431e-06	1.11982e-05
230	1.49941e-05	9.85006e-06	6.08079e-06	1.04195e-05
240	1.42726e-05	9.24379e-06	5.84973e-06	9.81116e-06
250	1.75299e-05	8.69541e-06	6.47173e-06	9.80592e-06
260	2.1812e-05	8.77222e-06	4.08029e-06	9.95238e-06
270	2.16511e-05	9.37406e-06	-2.428e-08	9.84542e-06
280	1.88085e-05	9.30192e-06	-2.93482e-06	8.75659e-06
290	1.84692e-05	8.81138e-06	-4.94698e-06	7.43171e-06
300	2.20612e-05	8.66143e-06	-7.19656e-06	6.89129e-06
310	2.47899e-05	9.28288e-06	-1.01684e-05	6.78154e-06
320	2.1919e-05	9.8853e-06	-1.27421e-05	6.30236e-06
330	1.38333e-05	9.87565e-06	-1.34923e-05	5.59346e-06
340	6.71858e-06	9.82049e-06	-1.27236e-05	5.99271e-06
350	4.70248e-06	9.85622e-06	-1.08848e-05	7.12394e-06
360	5.68464e-06	1.02027e-05	-8.84726e-06	7.43871e-06
370	5.02537e-06	1.00464e-05	-7.54991e-06	7.06513e-06
380	1.32746e-06	9.23227e-06	-6.67569e-06	6.81863e-06
390	-2.50121e-06	9.16141e-06	-4.38768e-06	6.7227e-06
400	-3.7609e-06	9.77957e-06	5.70808e-07	6.4252e-06
410	-3.23199e-06	1.0589e-05	7.17386e-06	5.55971e-06
420	3.88308e-08	1.1315e-05	1.20344e-05	5.3801e-06
430	4.58254e-06	1.19845e-05	1.40826e-05	5.91178e-06
440	7.27465e-06	1.25515e-05	1.54608e-05	5.75298e-06
450	8.08928e-06	1.29281e-05	1.78835e-05	5.53452e-06
460	1.02838e-05	1.34316e-05	1.97496e-05	5.98941e-06
470	1.61404e-05	1.37964e-05	1.96589e-05	6.93766e-06
480	2.0719e-05	1.38518e-05	1.85677e-05	8.17806e-06
490	1.95564e-05	1.33395e-05	1.72919e-05	9.06328e-06
500	1.41422e-05	1.19839e-05	1.59649e-05	9.60614e-06
510	9.85356e-06	1.02319e-05	1.39284e-05	1.01601e-05
520	8.65203e-06	8.51898e-06	1.25444e-05	1.06005e-05
530	8.33976e-06	6.90186e-06	1.1088e-05	1.05351e-05
540	5.0194e-06	5.99316e-06	8.87961e-06	9.68614e-06
550	4.33211e-08	6.36001e-06	5.76135e-06	8.34555e-06
560	-3.9916e-06	7.59601e-06	3.20756e-06	7.02308e-06
570	-5.1814e-06	8.92239e-06	2.45545e-06	5.93065e-06
580	-3.8994e-06	9.89232e-06	2.72081e-06	5.44757e-06
590	-2.06413e-06	1.06398e-05	2.33088e-06	5.48529e-06
600	-2.02905e-06	1.16202e-05	1.9221e-06	6.41494e-06

## Sheet: Fig. 4H
	high group	high group_CI	low group	low group_CI
phase 1_alpha power difference	4.7603e-05	3.32701e-05	2.15173e-06	1.434e-05
phase 2_alpha power difference	-1.53575e-05	2.10203e-05	-2.88073e-05	1.42813e-05
phase 3_alpha power difference	4.60378e-05	1.85969e-05	1.00007e-06	1.786e-05
