# Supplementary material for: Fast-backward replay of sequentially memorized items in humans
Source: eLife. 2018 Oct 18;7:e35164. doi: 10.7554/eLife.35164 (PMC6231774; doi:10.7554/eLife.35164)
Supplement: Figure 5—source data 1. [file elife-35164-fig5-data1.xlsx]

## Sheet: Fig. 5A
	wm1	wm1_SEM	wm2	wm2_SEM
target response probability	0.88085	0.02455	0.9205	0.0212

## Sheet: Fig.5B
time	wm1_alpha power_normalized	wm1_alpha power_normalized_SEM	wm2_alpha power_normalized	wm2_alpha power_normalized_SEM
0	-2.7469e-06	8.15893e-06	4.47584e-06	8.24597e-06
10	-5.48789e-07	8.6503e-06	5.87801e-06	8.10086e-06
20	-2.2196e-07	8.47926e-06	8.91447e-06	8.2674e-06
30	-1.15573e-06	8.08905e-06	1.23919e-05	8.6014e-06
40	-1.9578e-06	8.00065e-06	1.45501e-05	8.83373e-06
50	-1.84054e-06	8.26427e-06	1.51517e-05	8.67273e-06
60	-1.39313e-06	8.44018e-06	1.56624e-05	8.32509e-06
70	-3.1401e-06	8.1464e-06	1.78288e-05	8.14575e-06
80	-6.40761e-06	7.58848e-06	2.05586e-05	8.32769e-06
90	-9.40866e-06	7.36384e-06	2.19395e-05	8.79611e-06
100	-1.03568e-05	7.77473e-06	2.11552e-05	9.14223e-06
110	-1.01657e-05	8.46255e-06	1.92175e-05	9.22417e-06
120	-1.04713e-05	9.00502e-06	1.70445e-05	9.25466e-06
130	-1.0903e-05	9.45146e-06	1.50233e-05	9.43407e-06
140	-1.094e-05	1.00776e-05	1.38921e-05	9.90598e-06
150	-1.02955e-05	1.07433e-05	1.34589e-05	1.04201e-05
160	-9.06223e-06	1.11262e-05	1.21311e-05	1.06656e-05
170	-7.81972e-06	1.11754e-05	9.20165e-06	1.06569e-05
180	-6.27455e-06	1.09705e-05	5.76981e-06	1.05801e-05
190	-4.28806e-06	1.07281e-05	3.86099e-06	1.0521e-05
200	-9.88626e-07	1.04361e-05	3.66087e-06	1.03577e-05
210	2.61701e-06	9.87241e-06	3.93489e-06	9.73874e-06
220	4.53518e-06	9.04191e-06	4.00354e-06	9.04815e-06
230	4.84631e-06	8.00764e-06	4.06785e-06	8.55199e-06
240	6.27378e-06	7.23871e-06	3.90794e-06	8.15262e-06
250	1.03619e-05	7.26963e-06	3.09927e-06	7.94867e-06
260	1.4547e-05	7.87259e-06	1.88371e-06	7.97477e-06
270	1.45128e-05	8.27294e-06	2.01512e-06	7.96953e-06
280	1.15508e-05	8.18428e-06	3.37329e-06	7.8098e-06
290	9.48756e-06	8.18321e-06	4.01212e-06	7.87019e-06
300	9.7778e-06	8.65915e-06	2.92708e-06	8.30391e-06
310	9.41911e-06	9.16973e-06	1.50469e-06	8.65541e-06
320	5.2194e-06	9.17961e-06	2.14705e-06	8.68558e-06
330	-1.90929e-06	8.6441e-06	5.22976e-06	8.74907e-06
340	-8.80573e-06	8.15693e-06	9.2353e-06	9.19531e-06
350	-1.26452e-05	8.20734e-06	1.22654e-05	9.72015e-06
360	-1.36908e-05	8.67567e-06	1.33387e-05	9.62523e-06
370	-1.48587e-05	8.78323e-06	1.32313e-05	8.99745e-06
380	-1.75991e-05	8.43594e-06	1.37461e-05	8.30022e-06
390	-2.12594e-05	8.31454e-06	1.59014e-05	8.15649e-06
400	-2.28576e-05	8.88346e-06	1.85692e-05	8.70338e-06
410	-2.14947e-05	9.74776e-06	2.03921e-05	9.212e-06
420	-1.83027e-05	1.01527e-05	2.08545e-05	9.09573e-06
430	-1.59641e-05	1.02699e-05	2.05262e-05	8.83498e-06
440	-1.48966e-05	1.07542e-05	2.04863e-05	9.54098e-06
450	-1.28053e-05	1.16701e-05	2.09558e-05	1.09933e-05
460	-8.70615e-06	1.2278e-05	2.13233e-05	1.18081e-05
470	-4.19904e-06	1.1922e-05	2.09314e-05	1.11877e-05
480	-2.36813e-06	1.1163e-05	1.99952e-05	1.00501e-05
490	-2.90144e-06	1.05483e-05	1.86435e-05	9.47482e-06
500	-3.39555e-06	9.94679e-06	1.72258e-05	9.42685e-06
510	-2.38241e-06	9.17845e-06	1.61133e-05	9.35655e-06
520	-1.23969e-06	8.08764e-06	1.55691e-05	8.74734e-06
530	-1.48228e-06	7.13327e-06	1.50937e-05	7.9695e-06
540	-2.80154e-06	6.63899e-06	1.42811e-05	7.42331e-06
550	-3.37601e-06	6.52589e-06	1.26214e-05	7.17781e-06
560	-2.08765e-06	6.67616e-06	9.99844e-06	7.10438e-06
570	3.97795e-07	7.07638e-06	6.80143e-06	7.05452e-06
580	3.39989e-06	7.61719e-06	3.73075e-06	7.06889e-06
590	6.25216e-06	8.263e-06	1.02429e-06	7.26139e-06
600	9.14492e-06	9.01387e-06	-1.43962e-06	7.69884e-06

## Sheet: Fig.5C
time	corss-item correlation coefficient	p<0.05 threshold (corrected)
-400	0.00852	0.64194
-390	0.00816	0.64194
-380	-0.01283	0.64194
-370	-0.05457	0.64194
-360	-0.10335	0.64194
-350	-0.14617	0.64194
-340	-0.18492	0.64194
-330	-0.23386	0.64194
-320	-0.29298	0.64194
-310	-0.34219	0.64194
-300	-0.3581	0.64194
-290	-0.33602	0.64194
-280	-0.28656	0.64194
-270	-0.21888	0.64194
-260	-0.13599	0.64194
-250	-0.03566	0.64194
-240	0.08512	0.64194
-230	0.22113	0.64194
-220	0.35752	0.64194
-210	0.47609	0.64194
-200	0.56885	0.64194
-190	0.6376	0.64194
-180	0.68131	0.64194
-170	0.69231	0.64194
-160	0.66687	0.64194
-150	0.61214	0.64194
-140	0.5394	0.64194
-130	0.44876	0.64194
-120	0.33904	0.64194
-110	0.22011	0.64194
-100	0.10718	0.64194
-90	0.00498	0.64194
-80	-0.09781	0.64194
-70	-0.21177	0.64194
-60	-0.3333	0.64194
-50	-0.44553	0.64194
-40	-0.53269	0.64194
-30	-0.59456	0.64194
-20	-0.64492	0.64194
-10	-0.69225	0.64194
0	-0.7239	0.64194
10	-0.65357	0.64194
20	-0.55132	0.64194
30	-0.44511	0.64194
40	-0.34482	0.64194
50	-0.2405	0.64194
60	-0.12062	0.64194
70	0.00585	0.64194
80	0.11542	0.64194
90	0.19069	0.64194
100	0.23471	0.64194
110	0.26624	0.64194
120	0.29556	0.64194
130	0.31318	0.64194
140	0.30592	0.64194
150	0.27776	0.64194
160	0.24743	0.64194
170	0.22069	0.64194
180	0.18876	0.64194
190	0.14565	0.64194
200	0.099	0.64194
210	0.05919	0.64194
220	0.02601	0.64194
230	-0.00684	0.64194
240	-0.03859	0.64194
250	-0.06283	0.64194
260	-0.07308	0.64194
270	-0.0717	0.64194
280	-0.06528	0.64194
290	-0.05794	0.64194
300	-0.04831	0.64194
310	-0.03186	0.64194
320	-0.01186	0.64194
330	0.00204	0.64194
340	0.00537	0.64194
350	0.00226	0.64194
360	0.00199	0.64194
370	0.00437	0.64194
380	0.00464	0.64194
390	0.00030172	0.64194
400	-0.00402	0.64194
